# Supplementary material
Source: PubMed Central journal article supplement (PMC5108028)
Supplement: jp6b07814_si_001.pdf [file jp6b07814_si_001.pdf]

## Supporting Information for

# How Large Should the QM Region Be in QM/MM Calculations? The Case of Catechol O-methyltransferase

Heather J. Kulik<sup>†,§,\*</sup>, Jianyu Zhang<sup>¶</sup>, Judith P. Klinman<sup>¶</sup>, and Todd J. Martinez<sup>†,§,\*</sup>

<sup>†</sup>Department of Chemistry and PULSE Institute, Stanford University, Stanford, CA 94305

<sup>§</sup>SLAC National Accelerator Laboratory, Menlo Park, CA 94025

<sup>¶</sup>Departments of Chemistry and of Molecular and Cell Biology and California Institute for Quantitative Biosciences, University of California, Berkeley, CA 94720

### Contents

|                                                                                            |          |
|--------------------------------------------------------------------------------------------|----------|
| <b>Table S1</b> Summary of QM region model sizes and residues included                     | Page S2  |
| <b>Figure S1</b> Band gap dependence on QM region for B3LYP and $\omega$ PBEh              | Page S4  |
| <b>Figure S2</b> C-O distance dependence for QM/MM optimizations on 3BWM                   | Page S5  |
| <b>Table S2</b> Distances along model 10 reaction                                          | Page S5  |
| <b>Table S3</b> Partial charge sums over core substrates for model 10 reaction             | Page S6  |
| <b>Figure S3</b> Model 1 charges along reaction coordinate                                 | Page S7  |
| <b>Table S4</b> Charge sums over QM residues w/ link for 1 <sup>st</sup> half of reaction  | Page S7  |
| <b>Table S5</b> Charge sums over QM residues w/ link for 2 <sup>nd</sup> half of reaction  | Page S9  |
| <b>Table S6</b> Charge sums over QM residues w/o link for 1 <sup>st</sup> half of reaction | Page S10 |
| <b>Table S7</b> Charge sums over QM residues w/o link for 2 <sup>nd</sup> half of reaction | Page S12 |
| <b>Figure S4</b> Variation of charge for select residues along reaction coordinate         | Page S13 |
| <b>Figure S5</b> Structure with sampled charge ranges across reaction coordinate           | Page S14 |
| <b>Table S8</b> Apo-holo charge difference w/ link for 1 <sup>st</sup> half of reaction    | Page S14 |
| <b>Table S9</b> Apo-holo charge difference w/ link for 2 <sup>nd</sup> half of reaction    | Page S16 |
| <b>Table S10</b> Apo-holo charge difference w/o link for 1 <sup>st</sup> half of reaction  | Page S17 |
| <b>Table S11</b> Apo-holo charge difference w/o link for 2 <sup>nd</sup> half of reaction  | Page S19 |
| <b>Table S12</b> 11 residue and 16 residue model residue lists                             | Page S20 |
| <b>Table S13</b> Residues absent from 16 residue model present in models 1-4               | Page S21 |
| <b>Text S1</b> Description of coordinates.zip file                                         | Page S21 |
| <b>Table S14</b> Comparison of CSA on Model 1 and Model 10 reactant geometries             | Page S22 |

---

\* Present Address: Department of Chemical Engineering, Massachusetts Institute of Technology, Cambridge, MA 02139

**Table S1.** QM region size choices in QM/MM calculations

| Region | radius | # at. | # res. | # link | charge |             |             |             |             |             |             |             |             |             |             |             |             |             |             |  |
|--------|--------|-------|--------|--------|--------|-------------|-------------|-------------|-------------|-------------|-------------|-------------|-------------|-------------|-------------|-------------|-------------|-------------|-------------|--|
| 1      | 0.00   | 64    | 0      | 0      | 2      | <b>Mg2+</b> | <b>SAM</b>  | <b>CAT</b>  |             |             |             |             |             |             |             |             |             |             |             |  |
| 2      | 1.75   | 120   | 3      | 6      | 2      | V42         | <b>K144</b> | <b>E199</b> | <b>Mg2+</b> | <b>SAM</b>  | <b>CAT</b>  | H2O1        |             |             |             |             |             |             |             |  |
| 3      | 2.00   | 172   | 7      | 14     | 0      | V42         | <b>E90</b>  | S119        | <b>D141</b> | <b>K144</b> | N170        | <b>E199</b> | <b>Mg2+</b> | <b>SAM</b>  | <b>CAT</b>  | H2O1        |             |             |             |  |
| 4      | 2.25   | 267   | 13     | 20     | 0      | V42         | G66         | <b>Y68</b>  | Y71         | S72         | <b>E90</b>  | I91         | S119        | <b>D141</b> | H142        | <b>K144</b> | N170        | <b>E199</b> | <b>Mg2+</b> |  |
|        |        |       |        |        |        | <b>SAM</b>  | <b>CAT</b>  | H2O1        |             |             |             |             |             |             |             |             |             |             |             |  |
| 5      | 2.50   | 387   | 19     | 26     | 1      | M40         | V42         | G66         | <b>Y68</b>  | Y71         | S72         | I89         | <b>E90</b>  | I91         | S119        | Q120        | F139        | <b>D141</b> | H142        |  |
|        |        |       |        |        |        | <b>K144</b> | <b>R146</b> | N170        | L198        | <b>E199</b> | <b>Mg2+</b> | <b>SAM</b>  | <b>CAT</b>  | H2O1        | H2O2        |             |             |             |             |  |
| 6      | 2.75   | 448   | 22     | 24     | 1      | <b>W38</b>  | M40         | V42         | G66         | A67         | <b>Y68</b>  | Y71         | S72         | I89         | <b>E90</b>  | I91         | S119        | Q120        | F139        |  |
|        |        |       |        |        |        | <b>D141</b> | H142        | <b>W143</b> | <b>K144</b> | <b>R146</b> | N170        | L198        | <b>E199</b> | <b>Mg2+</b> | <b>SAM</b>  | <b>CAT</b>  | H2O1        | H2O2        | H2O3        |  |
| 7      | 3.00   | 497   | 26     | 24     | 1      | <b>W38</b>  | M40         | N41         | V42         | G66         | A67         | <b>Y68</b>  | Y71         | S72         | I89         | <b>E90</b>  | I91         | N92         | C95         |  |
|        |        |       |        |        |        | A118        | S119        | Q120        | F139        | <b>D141</b> | H142        | <b>W143</b> | <b>K144</b> | <b>R146</b> | N170        | L198        | <b>E199</b> | <b>Mg2+</b> | <b>SAM</b>  |  |
|        |        |       |        |        |        | <b>CAT</b>  | H2O1        | H2O2        | H2O3        |             |             |             |             |             |             |             |             |             |             |  |
| 8      | 5.00   | 600   | 34     | 32     | -1     | <b>E6</b>   | <b>W38</b>  | M40         | N41         | V42         | <b>K46</b>  | <b>E64</b>  | G66         | A67         | <b>Y68</b>  | G70         | Y71         | S72         | I89         |  |
|        |        |       |        |        |        | <b>E90</b>  | I91         | N92         | C95         | G117        | A118        | S119        | Q120        | F139        | <b>D141</b> | H142        | <b>W143</b> | <b>K144</b> | <b>R146</b> |  |
|        |        |       |        |        |        | <b>D169</b> | N170        | C173        | P174        | L198        | <b>E199</b> | <b>Mg2+</b> | <b>SAM</b>  | <b>CAT</b>  | H2O1        | H2O2        | H2O3        |             |             |  |
| 9      | 6.00   | 762   | 45     | 32     | -3     | <b>K5</b>   | <b>E6</b>   | Q7          | L10         | <b>W38</b>  | M40         | N41         | V42         | G43         | <b>K46</b>  | <b>E64</b>  | L65         | G66         | A67         |  |
|        |        |       |        |        |        | <b>Y68</b>  | C69         | G70         | Y71         | S72         | A73         | I89         | <b>E90</b>  | I91         | N92         | C95         | G117        | A118        | S119        |  |
|        |        |       |        |        |        | Q120        | F139        | <b>D141</b> | H142        | <b>W143</b> | <b>K144</b> | <b>D145</b> | <b>R146</b> | Y147        | <b>D150</b> | <b>D169</b> | N170        | C173        | P174        |  |
|        |        |       |        |        |        | L198        | <b>E199</b> | <b>D205</b> | <b>Mg2+</b> | <b>SAM</b>  | <b>CAT</b>  | H2O1        | H2O2        | H2O3        |             |             |             |             |             |  |
| 10     | 7.00   | 964   | 58     | 32     | -3     | T4          | <b>K5</b>   | <b>E6</b>   | Q7          | <b>R8</b>   | I9          | L10         | N11         | <b>W38</b>  | A39         | M40         | N41         | V42         | G43         |  |
|        |        |       |        |        |        | <b>K46</b>  | <b>E64</b>  | L65         | G66         | A67         | <b>Y68</b>  | C69         | G70         | Y71         | S72         | A73         | M76         | T88         | I89         |  |
|        |        |       |        |        |        | <b>E90</b>  | I91         | N92         | C95         | A96         | I98         | T99         | V115        | G117        | A118        | S119        | Q120        | <b>D121</b> | F139        |  |
|        |        |       |        |        |        | L140        | <b>D141</b> | H142        | <b>W143</b> | <b>K144</b> | <b>D145</b> | <b>R146</b> | Y147        | <b>D150</b> | <b>D169</b> | N170        | C173        | P174        | L198        |  |
|        |        |       |        |        |        | <b>E199</b> | <b>D205</b> | <b>Mg2+</b> | <b>SAM</b>  | <b>CAT</b>  | H2O1        | H2O2        | H2O3        |             |             |             |             |             |             |  |

| Region | radius | # at. | # res. | # link | charge |             |             |             |             |             |             |             |             |             |             |            |      |             |             |
|--------|--------|-------|--------|--------|--------|-------------|-------------|-------------|-------------|-------------|-------------|-------------|-------------|-------------|-------------|------------|------|-------------|-------------|
| 9'     | 6.00   | 738   | 43     | 28     | -1     | <b>K5</b>   | <b>E6</b>   | Q7          | L10         | <b>W38</b>  | M40         | N41         | V42         | G43         | <b>K46</b>  | <b>E64</b> | L65  | G66         | A67         |
|        |        |       |        |        |        | <b>Y68</b>  | C69         | G70         | Y71         | S72         | A73         | I89         | <b>E90</b>  | I91         | N92         | C95        | G117 | A118        | S119        |
|        |        |       |        |        |        | Q120        | F139        | <b>D141</b> | H142        | <b>W143</b> | <b>K144</b> | <b>D145</b> | <b>R146</b> | Y147        | <b>D169</b> | N170       | C173 | P174        | L198        |
|        |        |       |        |        |        | <b>E199</b> | <b>Mg2+</b> | <b>SAM</b>  | <b>CAT</b>  | H2O1        | H2O2        | H2O3        |             |             |             |            |      |             |             |
| 10'    | 7.00   | 940   | 56     | 28     | -1     | T4          | <b>K5</b>   | <b>E6</b>   | Q7          | <b>R8</b>   | I9          | L10         | N11         | <b>W38</b>  | A39         | M40        | N41  | V42         | G43         |
|        |        |       |        |        |        | <b>K46</b>  | <b>E64</b>  | L65         | G66         | A67         | <b>Y68</b>  | C69         | G70         | Y71         | S72         | A73        | M76  | T88         | I89         |
|        |        |       |        |        |        | <b>E90</b>  | I91         | N92         | C95         | A96         | I98         | T99         | V115        | G117        | A118        | S119       | Q120 | <b>D121</b> | F139        |
|        |        |       |        |        |        | L140        | <b>D141</b> | H142        | <b>W143</b> | <b>K144</b> | <b>D145</b> | <b>R146</b> | Y147        | <b>D169</b> | N170        | C173       | P174 | L198        | <b>E199</b> |
|        |        |       |        |        |        | <b>Mg2+</b> | <b>SAM</b>  | <b>CAT</b>  | H2O1        | H2O2        | H2O3        |             |             |             |             |            |      |             |             |

**Legend:**

|                                                                                   |    |
|-----------------------------------------------------------------------------------|----|
|  | +2 |
|  | +1 |
|  | -1 |

***Bold italic indicates special experimental residues***

H2O1, H2O2, and H2O3 refer to three water molecules closest to active site from experimental structure (3BWM).

Radius indicates cutoff used to determine whether a residue was included in region

Atom #s are from original protein structure, excluding addition of link-atom hydrogens.

Link atom count is total # of QM and MM link atoms.

Charge is sum of individual residue charges (following color code)

Regions 9' and 10' are alternate regions that have -2 charge by excluding residues D150 and D205, indicated with underline.

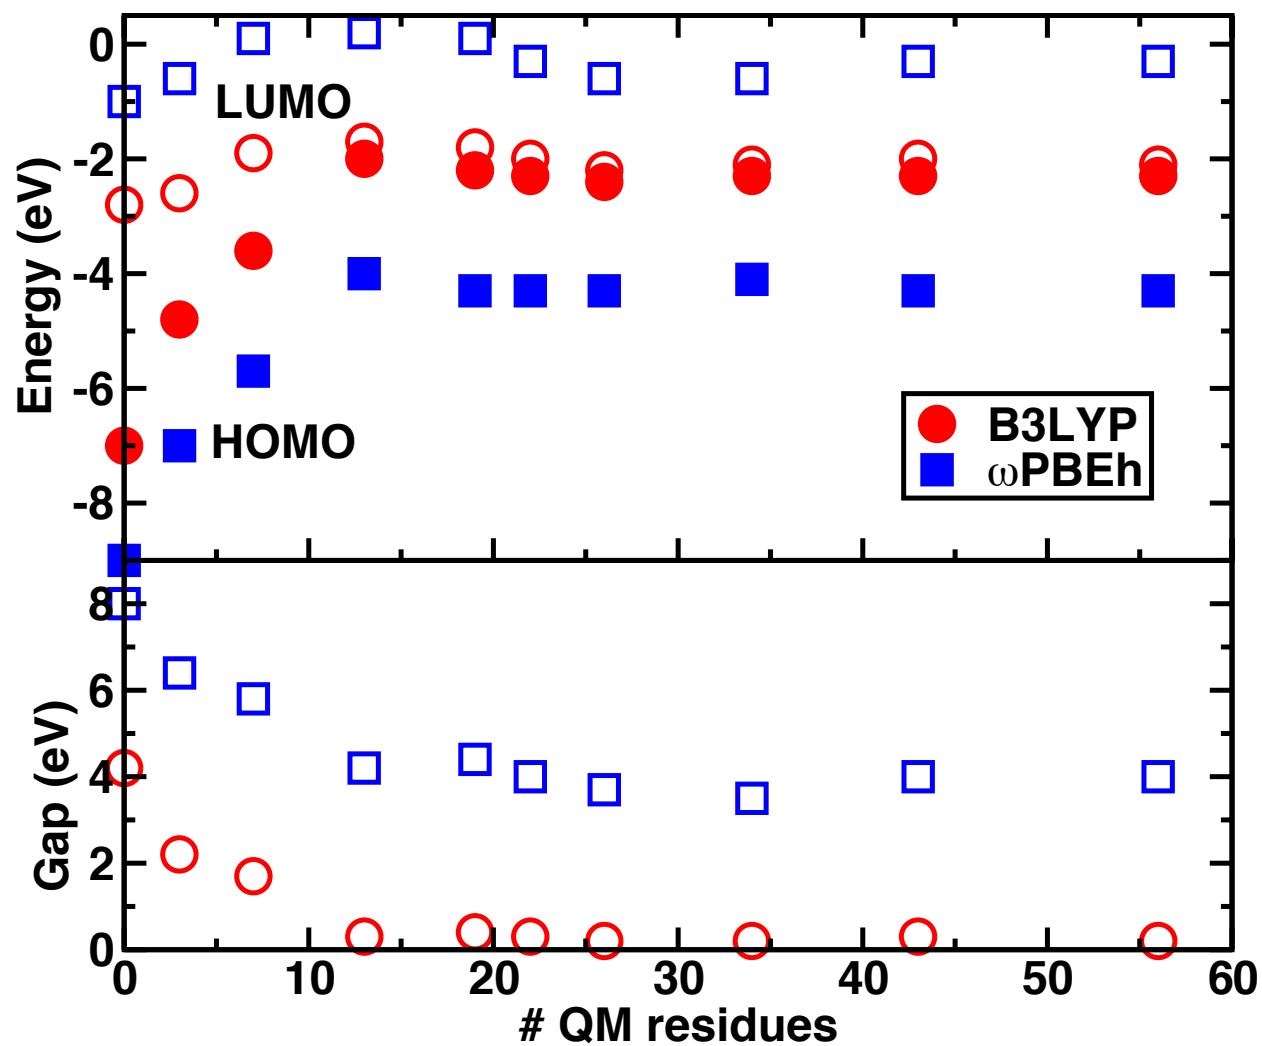

**Figure S1.** (top) Dependence of HOMO (filled symbols) and LUMO levels (open symbols) with QM region size for B3LYP (red circles) and  $\omega$ PBEh (blue squares). (bottom) HOMO-LUMO gap dependence with QM region size.

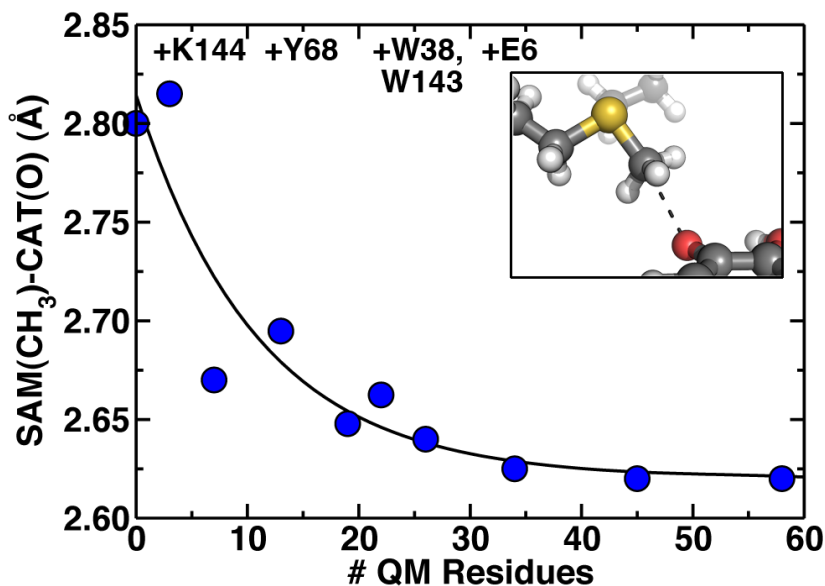

**Figure S2.** Geometry optimization results with increasing QM region size for SAM C – catechol O distance when starting from the X-ray crystal structure of COMT (3BWM), which has an initial C-O distance of 2.65 Å.

**Table S2.** Distances (in Å) for model 10 reaction: methyl C to catechol O, SAM S to methyl C, sam S to catechol O, and the reaction coordinate ( $\Delta$ ), which is the difference in S-C and C-O distances for 21 structures along the reaction coordinate.

| Image | C-O dist | S-C dist | S-O dist | $\Delta$ |
|-------|----------|----------|----------|----------|
| 1     | 2.86     | 1.87     | 4.64     | -0.99    |
| 2     | 2.84     | 1.86     | 4.62     | -0.98    |
| 3     | 2.78     | 1.86     | 4.56     | -0.91    |
| 4     | 2.71     | 1.91     | 4.54     | -0.80    |
| 5     | 2.67     | 1.95     | 4.54     | -0.72    |
| 6     | 2.56     | 2.00     | 4.53     | -0.56    |
| 7     | 2.49     | 2.08     | 4.54     | -0.41    |
| 8     | 2.33     | 2.11     | 4.39     | -0.23    |
| 9     | 2.24     | 2.23     | 4.44     | -0.01    |
| 10    | 2.07     | 2.32     | 4.38     | 0.24     |
| 11    | 1.91     | 2.36     | 4.27     | 0.45     |
| 12    | 1.80     | 2.46     | 4.25     | 0.67     |
| 13    | 1.68     | 2.57     | 4.24     | 0.89     |
| 14    | 1.64     | 2.70     | 4.33     | 1.06     |
| 15    | 1.57     | 2.82     | 4.37     | 1.25     |
| 16    | 1.54     | 2.94     | 4.46     | 1.40     |
| 17    | 1.48     | 3.06     | 4.53     | 1.58     |
| 18    | 1.49     | 3.16     | 4.64     | 1.67     |
| 19    | 1.45     | 3.22     | 4.67     | 1.77     |
| 20    | 1.48     | 3.33     | 4.80     | 1.85     |
| 21    | 1.44     | 3.28     | 4.72     | 1.84     |

**Table S3.** By-residue sums of VDD partial charges for SAM, catecholates, and  $Mg^{2+}$  with a few partitioning schemes along the reaction coordinate, e.g. AdoHcy (SAM without the methyl group), catecholate (CAT), SAM partial and CAT partial are the continuous reweighting based on  $\Delta$  of the methyl charge between the two species, and CAT+meth is the methylated catecholate.

| $\Delta$ | AdoHcy | CAT   | meth | SAM partial | CAT partial | SAM   | CAT+meth | $Mg^{2+}$ |
|----------|--------|-------|------|-------------|-------------|-------|----------|-----------|
| -0.99    | 0.09   | -0.76 | 0.29 | 0.38        | -0.76       | 0.38  | -0.48    | 0.31      |
| -0.98    | 0.03   | -0.72 | 0.29 | 0.32        | -0.72       | 0.32  | -0.43    | 0.31      |
| -0.91    | 0.07   | -0.72 | 0.27 | 0.34        | -0.71       | 0.34  | -0.45    | 0.30      |
| -0.80    | 0.14   | -0.73 | 0.28 | 0.40        | -0.72       | 0.41  | -0.46    | 0.30      |
| -0.72    | 0.04   | -0.65 | 0.24 | 0.26        | -0.63       | 0.28  | -0.41    | 0.31      |
| -0.56    | 0.03   | -0.71 | 0.31 | 0.30        | -0.66       | 0.35  | -0.40    | 0.29      |
| -0.41    | 0.02   | -0.73 | 0.35 | 0.30        | -0.66       | 0.37  | -0.39    | 0.31      |
| -0.23    | 0.05   | -0.67 | 0.38 | 0.33        | -0.57       | 0.43  | -0.29    | 0.31      |
| -0.01    | -0.14  | -0.64 | 0.39 | 0.12        | -0.50       | 0.25  | -0.25    | 0.29      |
| 0.24     | -0.14  | -0.56 | 0.40 | 0.09        | -0.38       | 0.26  | -0.15    | 0.29      |
| 0.45     | -0.18  | -0.47 | 0.42 | 0.03        | -0.25       | 0.25  | -0.04    | 0.32      |
| 0.67     | -0.35  | -0.42 | 0.43 | -0.17       | -0.17       | 0.08  | 0.01     | 0.31      |
| 0.89     | -0.26  | -0.38 | 0.39 | -0.13       | -0.12       | 0.13  | 0.02     | 0.31      |
| 1.06     | -0.28  | -0.25 | 0.38 | -0.17       | 0.03        | 0.10  | 0.13     | 0.35      |
| 1.25     | -0.31  | -0.16 | 0.28 | -0.25       | 0.07        | -0.02 | 0.13     | 0.30      |
| 1.40     | -0.33  | -0.24 | 0.29 | -0.28       | 0.01        | -0.03 | 0.06     | 0.30      |
| 1.58     | -0.34  | -0.25 | 0.30 | -0.32       | 0.03        | -0.04 | 0.06     | 0.33      |
| 1.67     | -0.33  | -0.17 | 0.24 | -0.32       | 0.05        | -0.09 | 0.07     | 0.31      |
| 1.77     | -0.36  | -0.11 | 0.24 | -0.36       | 0.13        | -0.12 | 0.13     | 0.32      |
| 1.85     | -0.31  | -0.04 | 0.19 | -0.31       | 0.15        | -0.12 | 0.15     | 0.34      |
| 1.84     | -0.42  | -0.12 | 0.20 | -0.42       | 0.07        | -0.22 | 0.07     | 0.34      |

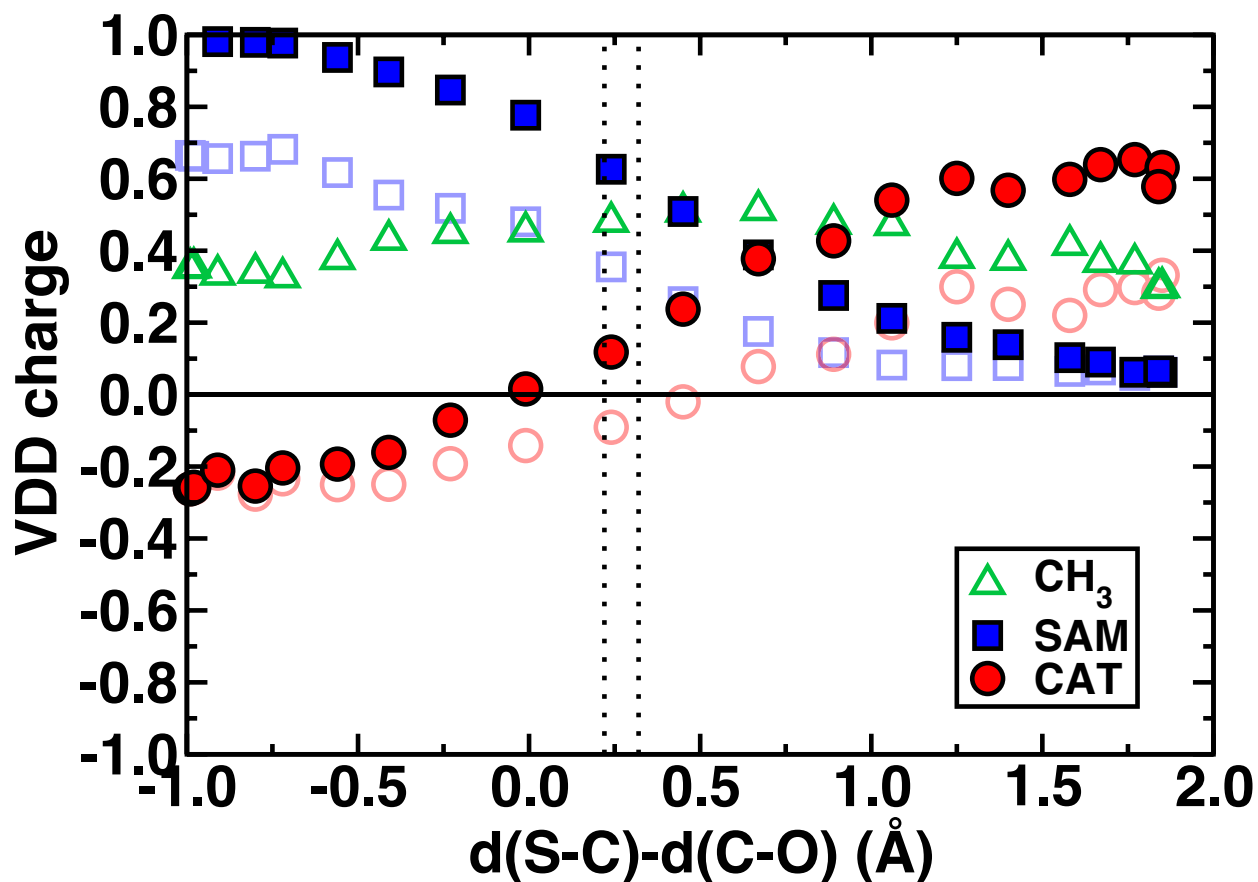

**Figure S3.** Model 1 partial charges on SAM and catecholite as described in the main text.

**Table S4.** By-residue sums of VDD partial charges for all model 10 residues including link atoms in the sum for the first 11 snapshots of the reaction coordinate along with canonical charge (labeled  $q$ ).

| Res.  | $q$ | 1     | 2     | 3     | 4     | 5     | 6     | 7     | 8     | 9     | 10    | 11    |
|-------|-----|-------|-------|-------|-------|-------|-------|-------|-------|-------|-------|-------|
| THR4  | 0   | 0.07  | 0.04  | 0.13  | 0.07  | 0.06  | 0.05  | 0.12  | 0.07  | 0.11  | 0.10  | 0.15  |
| LYS5  | 1   | 0.89  | 0.88  | 0.86  | 0.96  | 0.98  | 0.90  | 0.96  | 0.92  | 0.93  | 0.87  | 0.87  |
| GLU6  | -1  | -0.90 | -0.91 | -0.92 | -0.99 | -0.98 | -0.89 | -1.01 | -0.92 | -0.96 | -0.89 | -0.95 |
| GLN7  | 0   | 0.28  | 0.26  | 0.27  | 0.26  | 0.27  | 0.23  | 0.33  | 0.28  | 0.29  | 0.27  | 0.28  |
| ARG8  | 1   | 0.58  | 0.63  | 0.58  | 0.61  | 0.60  | 0.59  | 0.55  | 0.60  | 0.60  | 0.67  | 0.62  |
| ILE9  | 0   | 0.31  | 0.28  | 0.28  | 0.27  | 0.29  | 0.33  | 0.30  | 0.24  | 0.29  | 0.25  | 0.26  |
| LEU10 | 0   | -0.27 | -0.28 | -0.22 | -0.25 | -0.28 | -0.28 | -0.29 | -0.23 | -0.33 | -0.26 | -0.31 |
| ASN11 | 0   | 0.29  | 0.30  | 0.27  | 0.28  | 0.32  | 0.32  | 0.31  | 0.29  | 0.30  | 0.23  | 0.32  |
| TRP38 | 0   | -0.29 | -0.27 | -0.33 | -0.32 | -0.30 | -0.29 | -0.28 | -0.28 | -0.29 | -0.30 | -0.34 |
| ALA39 | 0   | 0.00  | -0.02 | 0.01  | 0.04  | 0.00  | -0.05 | -0.06 | -0.01 | 0.01  | 0.05  | 0.10  |
| MET40 | 0   | -0.02 | 0.04  | 0.01  | -0.05 | -0.06 | -0.03 | -0.02 | 0.00  | 0.00  | -0.04 | -0.15 |
| ASN41 | 0   | -0.08 | -0.04 | -0.08 | -0.10 | -0.09 | -0.10 | -0.02 | -0.12 | -0.07 | -0.08 | -0.05 |
| VAL42 | 0   | 0.03  | 0.00  | -0.01 | -0.03 | 0.00  | 0.03  | -0.03 | 0.00  | -0.01 | 0.00  | -0.03 |
| GLY43 | 0   | 0.38  | 0.36  | 0.39  | 0.44  | 0.41  | 0.39  | 0.38  | 0.44  | 0.42  | 0.40  | 0.46  |

|        |    |       |       |       |       |       |       |       |       |       |       |       |
|--------|----|-------|-------|-------|-------|-------|-------|-------|-------|-------|-------|-------|
| LYS46  | 1  | 0.66  | 0.64  | 0.70  | 0.63  | 0.71  | 0.75  | 0.73  | 0.66  | 0.67  | 0.70  | 0.66  |
| GLU64  | -1 | -0.47 | -0.43 | -0.50 | -0.52 | -0.51 | -0.51 | -0.52 | -0.48 | -0.49 | -0.51 | -0.56 |
| LEU65  | 0  | -0.18 | -0.21 | -0.18 | -0.13 | -0.14 | -0.18 | -0.17 | -0.25 | -0.19 | -0.20 | -0.20 |
| GLY66  | 0  | 0.16  | 0.13  | 0.10  | 0.14  | 0.18  | 0.19  | 0.18  | 0.15  | 0.12  | 0.17  | 0.18  |
| ALA67  | 0  | -0.12 | -0.11 | -0.12 | -0.15 | -0.17 | -0.14 | -0.15 | -0.10 | -0.10 | -0.09 | -0.12 |
| TYR68  | 0  | 0.08  | 0.08  | 0.08  | 0.08  | 0.02  | 0.10  | 0.08  | 0.10  | 0.11  | 0.04  | 0.08  |
| CYS69  | 0  | -0.13 | -0.15 | -0.16 | -0.09 | -0.03 | -0.18 | -0.15 | -0.09 | -0.16 | -0.18 | -0.11 |
| GLY70  | 0  | 0.28  | 0.31  | 0.31  | 0.26  | 0.25  | 0.34  | 0.31  | 0.26  | 0.30  | 0.33  | 0.23  |
| TYR71  | 0  | -0.38 | -0.38 | -0.41 | -0.37 | -0.42 | -0.40 | -0.41 | -0.37 | -0.35 | -0.35 | -0.35 |
| SER72  | 0  | 0.08  | 0.08  | 0.10  | 0.09  | 0.12  | 0.14  | 0.14  | 0.06  | 0.05  | 0.01  | 0.07  |
| ALA73  | 0  | 0.03  | 0.00  | 0.01  | 0.04  | 0.04  | 0.02  | -0.01 | 0.03  | 0.02  | 0.02  | 0.07  |
| MET76  | 0  | -0.06 | -0.04 | -0.04 | -0.06 | -0.08 | -0.05 | -0.04 | -0.05 | -0.03 | -0.04 | -0.06 |
| THR88  | 0  | -0.30 | -0.32 | -0.28 | -0.25 | -0.22 | -0.29 | -0.24 | -0.28 | -0.27 | -0.30 | -0.25 |
| ILE89  | 0  | -0.10 | -0.10 | -0.07 | -0.14 | -0.14 | -0.14 | -0.15 | -0.13 | -0.13 | -0.11 | -0.12 |
| GLU90  | 0  | -0.42 | -0.43 | -0.47 | -0.45 | -0.41 | -0.42 | -0.39 | -0.46 | -0.45 | -0.43 | -0.48 |
| ILE91  | 0  | 0.00  | 0.07  | 0.04  | 0.07  | 0.05  | 0.02  | 0.04  | 0.03  | 0.07  | 0.06  | 0.11  |
| ASN92  | 0  | 0.17  | 0.13  | 0.17  | 0.16  | 0.11  | 0.15  | 0.13  | 0.17  | 0.10  | 0.15  | 0.11  |
| CYS95  | 0  | -0.08 | -0.05 | -0.11 | -0.12 | -0.13 | -0.06 | -0.05 | -0.10 | -0.03 | -0.05 | -0.07 |
| ALA96  | 0  | 0.01  | 0.00  | 0.04  | 0.06  | 0.05  | -0.01 | -0.02 | 0.05  | 0.01  | -0.01 | 0.04  |
| ILE98  | 0  | -0.39 | -0.43 | -0.40 | -0.38 | -0.41 | -0.41 | -0.38 | -0.42 | -0.46 | -0.36 | -0.42 |
| THR99  | 0  | 0.46  | 0.46  | 0.45  | 0.41  | 0.45  | 0.45  | 0.45  | 0.46  | 0.50  | 0.45  | 0.47  |
| VAL115 | 0  | -0.14 | -0.13 | -0.15 | -0.11 | -0.13 | -0.11 | -0.16 | -0.16 | -0.14 | -0.16 | -0.16 |
| GLY117 | 0  | -0.41 | -0.41 | -0.41 | -0.37 | -0.43 | -0.41 | -0.40 | -0.34 | -0.43 | -0.47 | -0.41 |
| ALA118 | 0  | 0.18  | 0.19  | 0.19  | 0.14  | 0.22  | 0.21  | 0.22  | 0.13  | 0.21  | 0.24  | 0.21  |
| SER119 | 0  | -0.10 | -0.06 | 0.02  | -0.06 | -0.10 | -0.10 | -0.14 | 0.00  | -0.03 | -0.06 | -0.15 |
| GLN120 | 0  | -0.06 | -0.09 | -0.07 | -0.09 | -0.10 | -0.11 | -0.04 | -0.10 | -0.03 | 0.01  | -0.05 |
| ASP121 | -1 | -0.61 | -0.61 | -0.64 | -0.61 | -0.59 | -0.56 | -0.59 | -0.59 | -0.66 | -0.67 | -0.59 |
| PHE139 | 0  | 0.02  | 0.00  | 0.02  | 0.06  | 0.03  | 0.01  | 0.03  | 0.00  | 0.05  | 0.07  | 0.02  |
| LEU140 | 0  | -0.19 | -0.21 | -0.18 | -0.18 | -0.21 | -0.17 | -0.22 | -0.19 | -0.24 | -0.23 | -0.21 |
| ASP141 | 0  | -0.38 | -0.36 | -0.42 | -0.40 | -0.31 | -0.41 | -0.39 | -0.43 | -0.38 | -0.48 | -0.48 |
| HIE142 | 0  | 0.09  | 0.08  | 0.14  | 0.06  | 0.06  | 0.04  | 0.06  | -0.02 | -0.01 | 0.12  | 0.10  |
| TRP143 | 0  | 0.30  | 0.29  | 0.25  | 0.28  | 0.27  | 0.28  | 0.27  | 0.33  | 0.29  | 0.23  | 0.29  |
| LYS144 | 1  | 0.63  | 0.67  | 0.68  | 0.66  | 0.70  | 0.66  | 0.67  | 0.63  | 0.64  | 0.61  | 0.63  |
| ASP145 | -1 | -0.92 | -0.96 | -0.99 | -0.95 | -0.98 | -0.94 | -0.97 | -0.95 | -0.89 | -0.98 | -0.92 |
| ARG146 | 1  | 1.09  | 1.09  | 1.13  | 1.14  | 1.12  | 1.12  | 1.09  | 1.09  | 1.13  | 1.21  | 1.13  |
| TYR147 | 0  | -0.12 | -0.13 | -0.12 | -0.18 | -0.17 | -0.18 | -0.14 | -0.12 | -0.17 | -0.19 | -0.16 |
| ASP169 | -1 | -0.56 | -0.56 | -0.61 | -0.57 | -0.57 | -0.56 | -0.53 | -0.59 | -0.56 | -0.58 | -0.54 |
| ASN170 | 0  | 0.03  | 0.03  | 0.06  | 0.07  | 0.05  | 0.03  | 0.01  | 0.03  | 0.01  | 0.01  | 0.01  |
| CYS173 | 0  | -0.21 | -0.23 | -0.20 | -0.23 | -0.22 | -0.20 | -0.21 | -0.12 | -0.13 | -0.16 | -0.17 |
| PRO174 | 0  | 0.30  | 0.34  | 0.28  | 0.30  | 0.30  | 0.32  | 0.34  | 0.27  | 0.27  | 0.33  | 0.35  |
| LEU198 | 0  | -0.06 | -0.12 | -0.06 | -0.06 | -0.06 | -0.06 | -0.09 | -0.10 | -0.11 | -0.09 | -0.10 |
| GLU199 | -1 | -0.66 | -0.63 | -0.66 | -0.64 | -0.63 | -0.70 | -0.64 | -0.60 | -0.63 | -0.64 | -0.61 |
| MG216  | 2  | 0.07  | 0.07  | 0.07  | 0.06  | 0.06  | 0.07  | 0.07  | 0.07  | 0.07  | 0.06  | 0.07  |
| SAM217 | 0  | 0.33  | 0.28  | 0.27  | 0.32  | 0.23  | 0.27  | 0.27  | 0.33  | 0.19  | 0.23  | 0.20  |



|        |    |       |       |       |       |       |       |       |       |       |       |       |
|--------|----|-------|-------|-------|-------|-------|-------|-------|-------|-------|-------|-------|
| CAT218 | -1 | -0.82 | -0.80 | -0.80 | -0.82 | -0.78 | -0.79 | -0.79 | -0.76 | -0.73 | -0.65 | -0.56 |
| WAT226 | 0  | -0.06 | -0.06 | -0.08 | -0.11 | -0.10 | -0.08 | -0.04 | -0.10 | -0.05 | -0.08 | -0.13 |
| WAT227 | 0  | -0.03 | 0.00  | -0.02 | -0.01 | -0.01 | -0.03 | -0.03 | -0.02 | -0.04 | 0.01  | 0.02  |
| WAT228 | 0  | 0.00  | 0.00  | 0.00  | 0.00  | 0.00  | 0.00  | 0.00  | 0.00  | 0.00  | 0.00  | 0.00  |

**Table S5.** By-residue sums of VDD partial charges for all model 10 residues including link atoms in the sum for the last 11 snapshots of the reaction coordinate along with range, max, min, average, and deviation from canonical charge over full reaction coordinate.

| Res.  | 12    | 13    | 14    | 15    | 16    | 17    | 18    | 19    | 20    | 21    | range | max   | min   | avg   | dev.  |
|-------|-------|-------|-------|-------|-------|-------|-------|-------|-------|-------|-------|-------|-------|-------|-------|
| THR4  | 0.09  | -0.02 | 0.01  | 0.02  | 0.03  | 0.04  | 0.03  | 0.03  | 0.08  | 0.00  | 0.17  | 0.15  | -0.02 | 0.06  | 0.06  |
| LYS5  | 0.89  | 0.98  | 0.90  | 1.01  | 1.00  | 0.96  | 1.02  | 0.93  | 0.95  | 1.02  | 0.16  | 1.02  | 0.86  | 0.94  | -0.06 |
| GLU6  | -0.92 | -0.97 | -0.93 | -0.94 | -0.98 | -0.96 | -0.96 | -0.93 | -1.01 | -0.98 | 0.12  | -0.89 | -1.01 | -0.95 | 0.05  |
| GLN7  | 0.29  | 0.26  | 0.32  | 0.27  | 0.25  | 0.29  | 0.25  | 0.27  | 0.29  | 0.26  | 0.10  | 0.33  | 0.23  | 0.28  | 0.28  |
| ARG8  | 0.59  | 0.66  | 0.65  | 0.61  | 0.64  | 0.62  | 0.64  | 0.63  | 0.65  | 0.60  | 0.11  | 0.67  | 0.55  | 0.62  | -0.38 |
| ILE9  | 0.30  | 0.24  | 0.22  | 0.30  | 0.27  | 0.29  | 0.23  | 0.28  | 0.25  | 0.28  | 0.10  | 0.33  | 0.22  | 0.27  | 0.27  |
| LEU10 | -0.31 | -0.33 | -0.30 | -0.28 | -0.29 | -0.27 | -0.28 | -0.31 | -0.30 | -0.26 | 0.11  | -0.22 | -0.33 | -0.28 | -0.28 |
| ASN11 | 0.29  | 0.29  | 0.26  | 0.26  | 0.28  | 0.25  | 0.33  | 0.32  | 0.32  | 0.32  | 0.10  | 0.33  | 0.23  | 0.29  | 0.29  |
| TRP38 | -0.31 | -0.28 | -0.28 | -0.31 | -0.33 | -0.32 | -0.30 | -0.32 | -0.31 | -0.37 | 0.10  | -0.27 | -0.37 | -0.31 | -0.31 |
| ALA39 | 0.06  | 0.01  | -0.01 | -0.07 | -0.03 | 0.00  | 0.02  | 0.07  | 0.05  | 0.07  | 0.17  | 0.10  | -0.07 | 0.01  | 0.01  |
| MET40 | -0.10 | -0.04 | -0.02 | 0.03  | -0.03 | -0.03 | -0.03 | -0.13 | -0.11 | -0.12 | 0.20  | 0.04  | -0.15 | -0.04 | -0.04 |
| ASN41 | -0.09 | -0.03 | -0.11 | -0.15 | -0.11 | -0.10 | -0.18 | -0.13 | -0.15 | -0.14 | 0.16  | -0.02 | -0.18 | -0.10 | -0.10 |
| VAL42 | 0.04  | -0.03 | 0.03  | 0.01  | 0.04  | -0.05 | 0.01  | -0.03 | -0.02 | -0.03 | 0.09  | 0.04  | -0.05 | 0.00  | 0.00  |
| GLY43 | 0.42  | 0.41  | 0.43  | 0.41  | 0.42  | 0.45  | 0.43  | 0.46  | 0.48  | 0.45  | 0.12  | 0.48  | 0.36  | 0.42  | 0.42  |
| LYS46 | 0.67  | 0.65  | 0.62  | 0.66  | 0.60  | 0.66  | 0.62  | 0.66  | 0.64  | 0.71  | 0.15  | 0.75  | 0.60  | 0.67  | -0.33 |
| GLU64 | -0.56 | -0.48 | -0.50 | -0.46 | -0.45 | -0.46 | -0.51 | -0.51 | -0.49 | -0.51 | 0.13  | -0.43 | -0.56 | -0.50 | 0.50  |
| LEU65 | -0.21 | -0.19 | -0.20 | -0.25 | -0.21 | -0.24 | -0.22 | -0.21 | -0.18 | -0.18 | 0.12  | -0.13 | -0.25 | -0.20 | -0.20 |
| GLY66 | 0.18  | 0.22  | 0.18  | 0.25  | 0.22  | 0.26  | 0.23  | 0.25  | 0.22  | 0.24  | 0.16  | 0.26  | 0.10  | 0.19  | 0.19  |
| ALA67 | -0.16 | -0.15 | -0.14 | -0.20 | -0.15 | -0.13 | -0.14 | -0.14 | -0.14 | -0.15 | 0.11  | -0.09 | -0.20 | -0.14 | -0.14 |
| TYR68 | 0.03  | 0.01  | 0.07  | 0.05  | 0.02  | 0.03  | -0.02 | 0.00  | -0.02 | 0.03  | 0.13  | 0.11  | -0.02 | 0.05  | 0.05  |
| CYS69 | -0.16 | -0.16 | -0.12 | -0.21 | -0.13 | -0.15 | -0.10 | -0.11 | -0.10 | -0.06 | 0.18  | -0.03 | -0.21 | -0.13 | -0.13 |
| GLY70 | 0.32  | 0.30  | 0.29  | 0.36  | 0.27  | 0.27  | 0.31  | 0.27  | 0.24  | 0.24  | 0.12  | 0.36  | 0.23  | 0.29  | 0.29  |
| TYR71 | -0.44 | -0.40 | -0.40 | -0.36 | -0.36 | -0.32 | -0.38 | -0.33 | -0.33 | -0.27 | 0.16  | -0.27 | -0.44 | -0.37 | -0.37 |
| SER72 | 0.09  | 0.08  | 0.10  | 0.10  | 0.10  | 0.05  | 0.13  | 0.09  | 0.10  | 0.03  | 0.13  | 0.14  | 0.01  | 0.09  | 0.09  |
| ALA73 | 0.10  | 0.04  | 0.06  | 0.03  | 0.11  | 0.04  | 0.01  | 0.02  | 0.07  | 0.11  | 0.12  | 0.11  | -0.01 | 0.04  | 0.04  |
| MET76 | -0.10 | -0.05 | -0.12 | -0.08 | -0.10 | -0.08 | -0.07 | -0.10 | -0.08 | -0.09 | 0.09  | -0.03 | -0.12 | -0.07 | -0.07 |
| THR88 | -0.25 | -0.25 | -0.24 | -0.29 | -0.30 | -0.24 | -0.26 | -0.25 | -0.29 | -0.23 | 0.10  | -0.22 | -0.32 | -0.27 | -0.27 |
| ILE89 | -0.11 | -0.14 | -0.12 | -0.09 | -0.10 | -0.12 | -0.11 | -0.19 | -0.12 | -0.18 | 0.11  | -0.07 | -0.19 | -0.12 | -0.12 |
| GLU90 | -0.41 | -0.46 | -0.36 | -0.45 | -0.48 | -0.44 | -0.40 | -0.43 | -0.43 | -0.37 | 0.12  | -0.36 | -0.48 | -0.43 | -0.43 |
| ILE91 | 0.06  | 0.09  | -0.02 | 0.04  | 0.07  | 0.03  | -0.02 | -0.01 | 0.00  | -0.03 | 0.14  | 0.11  | -0.03 | 0.04  | 0.04  |
| ASN92 | 0.13  | 0.09  | 0.02  | 0.11  | 0.14  | 0.09  | 0.11  | 0.14  | 0.15  | 0.14  | 0.15  | 0.17  | 0.02  | 0.13  | 0.13  |
| CYS95 | -0.02 | -0.08 | 0.01  | -0.08 | -0.09 | -0.05 | 0.01  | -0.03 | -0.03 | -0.09 | 0.15  | 0.01  | -0.13 | -0.06 | -0.06 |
| ALA96 | 0.01  | 0.01  | 0.00  | 0.04  | 0.09  | 0.04  | -0.02 | 0.03  | 0.01  | 0.03  | 0.11  | 0.09  | -0.02 | 0.02  | 0.02  |
| ILE98 | -0.40 | -0.37 | -0.41 | -0.42 | -0.43 | -0.42 | -0.37 | -0.43 | -0.47 | -0.41 | 0.11  | -0.36 | -0.47 | -0.41 | -0.41 |
| THR99 | 0.45  | 0.47  | 0.46  | 0.46  | 0.44  | 0.47  | 0.41  | 0.49  | 0.51  | 0.47  | 0.10  | 0.51  | 0.41  | 0.46  | 0.46  |

|        |       |       |       |       |       |       |       |       |       |       |      |       |       |       |       |
|--------|-------|-------|-------|-------|-------|-------|-------|-------|-------|-------|------|-------|-------|-------|-------|
| VAL115 | -0.13 | -0.11 | -0.15 | -0.13 | -0.13 | -0.12 | -0.15 | -0.14 | -0.16 | -0.16 | 0.06 | -0.11 | -0.16 | -0.14 | -0.14 |
| GLY117 | -0.47 | -0.48 | -0.43 | -0.45 | -0.44 | -0.45 | -0.41 | -0.44 | -0.42 | -0.38 | 0.14 | -0.34 | -0.48 | -0.42 | -0.42 |
| ALA118 | 0.22  | 0.20  | 0.16  | 0.18  | 0.17  | 0.18  | 0.23  | 0.22  | 0.20  | 0.15  | 0.11 | 0.24  | 0.13  | 0.19  | 0.19  |
| SER119 | -0.07 | -0.05 | -0.01 | -0.03 | -0.11 | -0.02 | -0.06 | -0.09 | -0.11 | -0.06 | 0.17 | 0.02  | -0.15 | -0.07 | -0.07 |
| GLN120 | 0.00  | -0.08 | -0.02 | -0.03 | 0.00  | -0.04 | -0.01 | -0.04 | -0.03 | -0.02 | 0.12 | 0.01  | -0.11 | -0.05 | -0.05 |
| ASP121 | -0.63 | -0.57 | -0.62 | -0.60 | -0.60 | -0.60 | -0.64 | -0.61 | -0.61 | -0.64 | 0.11 | -0.56 | -0.67 | -0.61 | 0.39  |
| PHE139 | 0.00  | 0.00  | -0.01 | 0.01  | -0.03 | 0.00  | 0.05  | 0.06  | 0.04  | 0.02  | 0.10 | 0.07  | -0.03 | 0.02  | 0.02  |
| LEU140 | -0.14 | -0.16 | -0.16 | -0.23 | -0.18 | -0.19 | -0.18 | -0.21 | -0.20 | -0.14 | 0.10 | -0.14 | -0.24 | -0.19 | -0.19 |
| ASP141 | -0.46 | -0.49 | -0.50 | -0.48 | -0.37 | -0.47 | -0.50 | -0.45 | -0.42 | -0.45 | 0.19 | -0.31 | -0.50 | -0.43 | -0.43 |
| HIE142 | 0.11  | 0.08  | 0.08  | 0.12  | 0.05  | 0.05  | 0.03  | 0.02  | 0.04  | 0.01  | 0.17 | 0.14  | -0.02 | 0.06  | 0.06  |
| TRP143 | 0.28  | 0.30  | 0.30  | 0.35  | 0.29  | 0.26  | 0.27  | 0.29  | 0.30  | 0.29  | 0.12 | 0.35  | 0.23  | 0.29  | 0.29  |
| LYS144 | 0.63  | 0.62  | 0.66  | 0.56  | 0.64  | 0.69  | 0.66  | 0.72  | 0.70  | 0.71  | 0.15 | 0.72  | 0.56  | 0.65  | -0.35 |
| ASP145 | -0.95 | -0.93 | -0.92 | -0.90 | -0.98 | -0.99 | -0.96 | -1.03 | -1.01 | -0.97 | 0.14 | -0.89 | -1.03 | -0.96 | 0.04  |
| ARG146 | 1.16  | 1.12  | 1.09  | 1.09  | 1.18  | 1.13  | 1.13  | 1.13  | 1.12  | 1.09  | 0.13 | 1.21  | 1.09  | 1.12  | 0.12  |
| TYR147 | -0.16 | -0.18 | -0.15 | -0.15 | -0.17 | -0.16 | -0.14 | -0.11 | -0.12 | -0.12 | 0.08 | -0.11 | -0.19 | -0.15 | -0.15 |
| ASP169 | -0.49 | -0.48 | -0.49 | -0.48 | -0.53 | -0.48 | -0.53 | -0.54 | -0.55 | -0.54 | 0.13 | -0.48 | -0.61 | -0.54 | 0.46  |
| ASN170 | -0.01 | -0.02 | -0.05 | 0.00  | 0.03  | -0.02 | 0.03  | 0.03  | 0.06  | -0.03 | 0.12 | 0.07  | -0.05 | 0.02  | 0.02  |
| CYS173 | -0.16 | -0.10 | -0.11 | -0.19 | -0.14 | -0.16 | -0.16 | -0.20 | -0.18 | -0.16 | 0.13 | -0.10 | -0.23 | -0.17 | -0.17 |
| PRO174 | 0.29  | 0.24  | 0.27  | 0.29  | 0.24  | 0.31  | 0.24  | 0.30  | 0.29  | 0.29  | 0.11 | 0.35  | 0.24  | 0.29  | 0.29  |
| LEU198 | -0.10 | -0.10 | -0.12 | -0.05 | -0.06 | -0.04 | 0.00  | -0.03 | -0.04 | -0.08 | 0.12 | 0.00  | -0.12 | -0.07 | -0.07 |
| GLU199 | -0.59 | -0.54 | -0.59 | -0.60 | -0.54 | -0.58 | -0.63 | -0.66 | -0.62 | -0.58 | 0.17 | -0.54 | -0.70 | -0.62 | 0.38  |
| MG216  | 0.07  | 0.08  | 0.08  | 0.08  | 0.07  | 0.09  | 0.08  | 0.08  | 0.08  | 0.08  | 0.03 | 0.09  | 0.06  | 0.07  | -1.93 |
| SAM217 | 0.01  | 0.04  | 0.01  | -0.09 | -0.09 | -0.12 | -0.12 | -0.12 | -0.12 | -0.21 | 0.55 | 0.33  | -0.21 | 0.10  | 0.10  |
| CAT218 | -0.52 | -0.47 | -0.36 | -0.32 | -0.36 | -0.34 | -0.31 | -0.26 | -0.22 | -0.25 | 0.59 | -0.22 | -0.82 | -0.56 | 0.44  |
| WAT226 | -0.14 | -0.13 | -0.11 | -0.07 | -0.10 | -0.11 | -0.06 | -0.06 | -0.11 | -0.11 | 0.10 | -0.04 | -0.14 | -0.09 | -0.09 |
| WAT227 | -0.03 | -0.02 | -0.01 | -0.04 | -0.06 | -0.01 | -0.01 | -0.02 | -0.07 | -0.06 | 0.09 | 0.02  | -0.07 | -0.02 | -0.02 |
| WAT228 | 0.00  | 0.00  | 0.00  | 0.00  | 0.00  | 0.00  | 0.00  | 0.00  | 0.00  | 0.00  | 0.00 | 0.00  | 0.00  | 0.00  | 0.00  |

**Table S6.** By-residue sums of VDD partial charges for all model 10 residues excluding link atoms in the sum for the first 11 snapshots of the reaction coordinate.

| Res.  | 1     | 2     | 3     | 4     | 5     | 6     | 7     | 8     | 9     | 10    | 11    |
|-------|-------|-------|-------|-------|-------|-------|-------|-------|-------|-------|-------|
| THR4  | -0.20 | -0.21 | -0.16 | -0.17 | -0.19 | -0.20 | -0.15 | -0.20 | -0.17 | -0.18 | -0.14 |
| LYS5  | 0.89  | 0.88  | 0.86  | 0.96  | 0.98  | 0.90  | 0.96  | 0.92  | 0.93  | 0.87  | 0.87  |
| GLU6  | -0.90 | -0.91 | -0.92 | -0.99 | -0.98 | -0.89 | -1.01 | -0.92 | -0.96 | -0.89 | -0.95 |
| GLN7  | 0.28  | 0.26  | 0.27  | 0.26  | 0.27  | 0.23  | 0.33  | 0.28  | 0.29  | 0.27  | 0.28  |
| ARG8  | 0.58  | 0.63  | 0.58  | 0.61  | 0.60  | 0.59  | 0.55  | 0.60  | 0.60  | 0.67  | 0.62  |
| ILE9  | 0.31  | 0.28  | 0.28  | 0.27  | 0.29  | 0.33  | 0.30  | 0.24  | 0.29  | 0.25  | 0.26  |
| LEU10 | -0.27 | -0.28 | -0.22 | -0.25 | -0.28 | -0.28 | -0.29 | -0.23 | -0.33 | -0.26 | -0.31 |
| ASN11 | 0.18  | 0.16  | 0.16  | 0.16  | 0.20  | 0.20  | 0.21  | 0.18  | 0.19  | 0.13  | 0.20  |
| TRP38 | -0.27 | -0.27 | -0.31 | -0.31 | -0.27 | -0.24 | -0.25 | -0.26 | -0.28 | -0.29 | -0.32 |
| ALA39 | 0.00  | -0.02 | 0.01  | 0.04  | 0.00  | -0.05 | -0.06 | -0.01 | 0.01  | 0.05  | 0.10  |
| MET40 | -0.02 | 0.04  | 0.01  | -0.05 | -0.06 | -0.03 | -0.02 | 0.00  | 0.00  | -0.04 | -0.15 |
| ASN41 | -0.08 | -0.04 | -0.08 | -0.10 | -0.09 | -0.10 | -0.02 | -0.12 | -0.07 | -0.08 | -0.05 |
| VAL42 | 0.03  | 0.00  | -0.01 | -0.03 | 0.00  | 0.03  | -0.03 | 0.00  | -0.01 | 0.00  | -0.03 |
| GLY43 | 0.19  | 0.18  | 0.18  | 0.25  | 0.23  | 0.19  | 0.19  | 0.25  | 0.23  | 0.20  | 0.26  |
| LYS46 | 0.36  | 0.36  | 0.41  | 0.39  | 0.45  | 0.46  | 0.44  | 0.39  | 0.42  | 0.43  | 0.39  |
| GLU64 | -0.54 | -0.50 | -0.55 | -0.58 | -0.56 | -0.55 | -0.55 | -0.52 | -0.54 | -0.56 | -0.61 |

|        |       |       |       |       |       |       |       |       |       |       |       |
|--------|-------|-------|-------|-------|-------|-------|-------|-------|-------|-------|-------|
| LEU65  | -0.18 | -0.21 | -0.18 | -0.13 | -0.14 | -0.18 | -0.17 | -0.25 | -0.19 | -0.20 | -0.20 |
| GLY66  | 0.16  | 0.13  | 0.10  | 0.14  | 0.18  | 0.19  | 0.18  | 0.15  | 0.12  | 0.17  | 0.18  |
| ALA67  | -0.12 | -0.11 | -0.12 | -0.15 | -0.17 | -0.14 | -0.15 | -0.10 | -0.10 | -0.09 | -0.12 |
| TYR68  | 0.08  | 0.08  | 0.08  | 0.08  | 0.02  | 0.10  | 0.08  | 0.10  | 0.11  | 0.04  | 0.08  |
| CYS69  | -0.13 | -0.15 | -0.16 | -0.09 | -0.03 | -0.18 | -0.15 | -0.09 | -0.16 | -0.18 | -0.11 |
| GLY70  | 0.28  | 0.31  | 0.31  | 0.26  | 0.25  | 0.34  | 0.31  | 0.26  | 0.30  | 0.33  | 0.23  |
| TYR71  | -0.38 | -0.38 | -0.41 | -0.37 | -0.42 | -0.40 | -0.41 | -0.37 | -0.35 | -0.35 | -0.35 |
| SER72  | 0.08  | 0.08  | 0.10  | 0.09  | 0.12  | 0.14  | 0.14  | 0.06  | 0.05  | 0.01  | 0.07  |
| ALA73  | -0.10 | -0.11 | -0.10 | -0.10 | -0.10 | -0.11 | -0.12 | -0.10 | -0.10 | -0.11 | -0.05 |
| MET76  | -0.33 | -0.34 | -0.32 | -0.33 | -0.36 | -0.31 | -0.34 | -0.32 | -0.31 | -0.30 | -0.29 |
| THR88  | -0.32 | -0.34 | -0.30 | -0.25 | -0.24 | -0.31 | -0.25 | -0.29 | -0.28 | -0.32 | -0.29 |
| ILE89  | -0.10 | -0.10 | -0.07 | -0.14 | -0.14 | -0.14 | -0.15 | -0.13 | -0.13 | -0.11 | -0.12 |
| GLU90  | -0.42 | -0.43 | -0.47 | -0.45 | -0.41 | -0.42 | -0.39 | -0.46 | -0.45 | -0.43 | -0.48 |
| ILE91  | 0.00  | 0.07  | 0.04  | 0.07  | 0.05  | 0.02  | 0.04  | 0.03  | 0.07  | 0.06  | 0.11  |
| ASN92  | 0.05  | 0.00  | 0.04  | 0.05  | -0.01 | 0.02  | 0.01  | 0.05  | -0.03 | 0.01  | -0.02 |
| CYS95  | -0.15 | -0.11 | -0.18 | -0.21 | -0.21 | -0.13 | -0.11 | -0.15 | -0.07 | -0.12 | -0.17 |
| ALA96  | -0.19 | -0.17 | -0.16 | -0.16 | -0.16 | -0.20 | -0.18 | -0.15 | -0.15 | -0.19 | -0.16 |
| ILE98  | -0.55 | -0.59 | -0.55 | -0.54 | -0.57 | -0.55 | -0.54 | -0.56 | -0.60 | -0.51 | -0.57 |
| THR99  | 0.12  | 0.12  | 0.12  | 0.09  | 0.11  | 0.12  | 0.12  | 0.12  | 0.18  | 0.13  | 0.15  |
| VAL115 | -0.34 | -0.34 | -0.30 | -0.32 | -0.35 | -0.31 | -0.35 | -0.33 | -0.29 | -0.33 | -0.37 |
| GLY117 | -0.52 | -0.52 | -0.52 | -0.49 | -0.53 | -0.51 | -0.51 | -0.46 | -0.54 | -0.57 | -0.52 |
| ALA118 | 0.18  | 0.19  | 0.19  | 0.14  | 0.22  | 0.21  | 0.22  | 0.13  | 0.21  | 0.24  | 0.21  |
| SER119 | -0.10 | -0.06 | 0.02  | -0.06 | -0.10 | -0.10 | -0.14 | 0.00  | -0.03 | -0.06 | -0.15 |
| GLN120 | -0.06 | -0.09 | -0.07 | -0.09 | -0.10 | -0.11 | -0.04 | -0.10 | -0.03 | 0.01  | -0.05 |
| ASP121 | -0.91 | -0.91 | -0.94 | -0.90 | -0.89 | -0.85 | -0.89 | -0.89 | -0.96 | -0.97 | -0.89 |
| PHE139 | -0.07 | -0.09 | -0.08 | -0.02 | -0.05 | -0.08 | -0.05 | -0.07 | -0.03 | -0.01 | -0.06 |
| LEU140 | -0.19 | -0.21 | -0.18 | -0.18 | -0.21 | -0.17 | -0.22 | -0.19 | -0.24 | -0.23 | -0.21 |
| ASP141 | -0.07 | -0.06 | -0.11 | -0.07 | 0.01  | -0.10 | -0.08 | -0.11 | -0.06 | -0.12 | -0.16 |
| HIE142 | 0.09  | 0.08  | 0.14  | 0.06  | 0.06  | 0.04  | 0.06  | -0.02 | -0.01 | 0.12  | 0.10  |
| TRP143 | 0.30  | 0.29  | 0.25  | 0.28  | 0.27  | 0.28  | 0.27  | 0.33  | 0.29  | 0.23  | 0.29  |
| LYS144 | 0.63  | 0.67  | 0.68  | 0.66  | 0.70  | 0.66  | 0.67  | 0.63  | 0.64  | 0.61  | 0.63  |
| ASP145 | -0.92 | -0.96 | -0.99 | -0.95 | -0.98 | -0.94 | -0.97 | -0.95 | -0.89 | -0.98 | -0.92 |
| ARG146 | 1.09  | 1.09  | 1.13  | 1.14  | 1.12  | 1.12  | 1.09  | 1.09  | 1.13  | 1.21  | 1.13  |
| TYR147 | -0.19 | -0.21 | -0.19 | -0.25 | -0.24 | -0.25 | -0.22 | -0.20 | -0.24 | -0.24 | -0.23 |
| ASP169 | -0.68 | -0.67 | -0.70 | -0.68 | -0.70 | -0.68 | -0.65 | -0.71 | -0.69 | -0.69 | -0.66 |
| ASN170 | -0.06 | -0.05 | -0.04 | -0.02 | -0.04 | -0.06 | -0.08 | -0.07 | -0.08 | -0.08 | -0.08 |
| CYS173 | -0.30 | -0.33 | -0.30 | -0.31 | -0.31 | -0.29 | -0.31 | -0.24 | -0.23 | -0.28 | -0.28 |
| PRO174 | 0.12  | 0.16  | 0.09  | 0.14  | 0.14  | 0.14  | 0.18  | 0.14  | 0.16  | 0.19  | 0.17  |
| LEU198 | -0.13 | -0.18 | -0.14 | -0.13 | -0.12 | -0.09 | -0.12 | -0.15 | -0.14 | -0.12 | -0.13 |
| GLU199 | -0.86 | -0.85 | -0.89 | -0.86 | -0.83 | -0.91 | -0.85 | -0.80 | -0.84 | -0.86 | -0.82 |
| MG216  | 0.07  | 0.07  | 0.07  | 0.06  | 0.06  | 0.07  | 0.07  | 0.07  | 0.07  | 0.06  | 0.07  |
| SAM217 | 0.03  | -0.03 | -0.04 | -0.01 | -0.09 | -0.04 | -0.04 | 0.02  | -0.12 | -0.13 | -0.13 |
| CAT218 | -0.82 | -0.80 | -0.80 | -0.82 | -0.78 | -0.79 | -0.79 | -0.76 | -0.73 | -0.65 | -0.56 |
| WAT226 | -0.06 | -0.06 | -0.08 | -0.11 | -0.10 | -0.08 | -0.04 | -0.10 | -0.05 | -0.08 | -0.13 |
| WAT227 | -0.03 | 0.00  | -0.02 | -0.01 | -0.01 | -0.03 | -0.03 | -0.02 | -0.04 | 0.01  | 0.02  |
| WAT228 | 0.00  | 0.00  | 0.00  | 0.00  | 0.00  | 0.00  | 0.00  | 0.00  | 0.00  | 0.00  | 0.00  |

**Table S7.** By-residue sums of VDD partial charges for all model 10 residues excluding link atoms in the sum for the last 11 snapshots of the reaction coordinate along with range, max, min, and average over the full reaction coordinate.

| Res.   | 12    | 13    | 14    | 15    | 16    | 17    | 18    | 19    | 20    | 21    | range | max   | min   | avg   |
|--------|-------|-------|-------|-------|-------|-------|-------|-------|-------|-------|-------|-------|-------|-------|
| THR4   | -0.18 | -0.23 | -0.22 | -0.24 | -0.20 | -0.23 | -0.26 | -0.22 | -0.17 | -0.25 | 0.12  | -0.14 | -0.26 | -0.20 |
| LYS5   | 0.89  | 0.98  | 0.90  | 1.01  | 1.00  | 0.96  | 1.02  | 0.93  | 0.95  | 1.02  | 0.16  | 1.02  | 0.86  | 0.94  |
| GLU6   | -0.92 | -0.97 | -0.93 | -0.94 | -0.98 | -0.96 | -0.96 | -0.93 | -1.01 | -0.98 | 0.12  | -0.89 | -1.01 | -0.95 |
| GLN7   | 0.29  | 0.26  | 0.32  | 0.27  | 0.25  | 0.29  | 0.25  | 0.27  | 0.29  | 0.26  | 0.10  | 0.33  | 0.23  | 0.28  |
| ARG8   | 0.59  | 0.66  | 0.65  | 0.61  | 0.64  | 0.62  | 0.64  | 0.63  | 0.65  | 0.60  | 0.11  | 0.67  | 0.55  | 0.62  |
| ILE9   | 0.30  | 0.24  | 0.22  | 0.30  | 0.27  | 0.29  | 0.23  | 0.28  | 0.25  | 0.28  | 0.10  | 0.33  | 0.22  | 0.27  |
| LEU10  | -0.31 | -0.33 | -0.30 | -0.28 | -0.29 | -0.27 | -0.28 | -0.31 | -0.30 | -0.26 | 0.11  | -0.22 | -0.33 | -0.28 |
| ASN11  | 0.15  | 0.17  | 0.15  | 0.15  | 0.16  | 0.15  | 0.21  | 0.21  | 0.22  | 0.21  | 0.09  | 0.22  | 0.13  | 0.18  |
| TRP38  | -0.30 | -0.28 | -0.27 | -0.29 | -0.30 | -0.30 | -0.27 | -0.30 | -0.29 | -0.32 | 0.08  | -0.24 | -0.32 | -0.28 |
| ALA39  | 0.06  | 0.01  | -0.01 | -0.07 | -0.03 | 0.00  | 0.02  | 0.07  | 0.05  | 0.07  | 0.17  | 0.10  | -0.07 | 0.01  |
| MET40  | -0.10 | -0.04 | -0.02 | 0.03  | -0.03 | -0.03 | -0.03 | -0.13 | -0.11 | -0.12 | 0.20  | 0.04  | -0.15 | -0.04 |
| ASN41  | -0.09 | -0.03 | -0.11 | -0.15 | -0.11 | -0.10 | -0.18 | -0.13 | -0.15 | -0.14 | 0.16  | -0.02 | -0.18 | -0.10 |
| VAL42  | 0.04  | -0.03 | 0.03  | 0.01  | 0.04  | -0.05 | 0.01  | -0.03 | -0.02 | -0.03 | 0.09  | 0.04  | -0.05 | 0.00  |
| GLY43  | 0.22  | 0.20  | 0.22  | 0.22  | 0.20  | 0.22  | 0.21  | 0.24  | 0.26  | 0.24  | 0.08  | 0.26  | 0.18  | 0.22  |
| LYS46  | 0.39  | 0.37  | 0.36  | 0.36  | 0.32  | 0.36  | 0.36  | 0.40  | 0.39  | 0.42  | 0.13  | 0.46  | 0.32  | 0.39  |
| GLU64  | -0.61 | -0.53 | -0.55 | -0.51 | -0.51 | -0.49 | -0.55 | -0.54 | -0.52 | -0.54 | 0.12  | -0.49 | -0.61 | -0.54 |
| LEU65  | -0.21 | -0.19 | -0.20 | -0.25 | -0.21 | -0.24 | -0.22 | -0.21 | -0.18 | -0.18 | 0.12  | -0.13 | -0.25 | -0.20 |
| GLY66  | 0.18  | 0.22  | 0.18  | 0.25  | 0.22  | 0.26  | 0.23  | 0.25  | 0.22  | 0.24  | 0.16  | 0.26  | 0.10  | 0.19  |
| ALA67  | -0.16 | -0.15 | -0.14 | -0.20 | -0.15 | -0.13 | -0.14 | -0.14 | -0.14 | -0.15 | 0.11  | -0.09 | -0.20 | -0.14 |
| TYR68  | 0.03  | 0.01  | 0.07  | 0.05  | 0.02  | 0.03  | -0.02 | 0.00  | -0.02 | 0.03  | 0.13  | 0.11  | -0.02 | 0.05  |
| CYS69  | -0.16 | -0.16 | -0.12 | -0.21 | -0.13 | -0.15 | -0.10 | -0.11 | -0.10 | -0.06 | 0.18  | -0.03 | -0.21 | -0.13 |
| GLY70  | 0.32  | 0.30  | 0.29  | 0.36  | 0.27  | 0.27  | 0.31  | 0.27  | 0.24  | 0.24  | 0.12  | 0.36  | 0.23  | 0.29  |
| TYR71  | -0.44 | -0.40 | -0.40 | -0.36 | -0.36 | -0.32 | -0.38 | -0.33 | -0.33 | -0.27 | 0.16  | -0.27 | -0.44 | -0.37 |
| SER72  | 0.09  | 0.08  | 0.10  | 0.10  | 0.10  | 0.05  | 0.13  | 0.09  | 0.10  | 0.03  | 0.13  | 0.14  | 0.01  | 0.09  |
| ALA73  | -0.04 | -0.08 | -0.06 | -0.07 | -0.02 | -0.06 | -0.09 | -0.08 | -0.06 | -0.04 | 0.10  | -0.02 | -0.12 | -0.08 |
| MET76  | -0.33 | -0.29 | -0.31 | -0.30 | -0.31 | -0.29 | -0.31 | -0.32 | -0.32 | -0.32 | 0.07  | -0.29 | -0.36 | -0.32 |
| THR88  | -0.27 | -0.27 | -0.27 | -0.31 | -0.32 | -0.26 | -0.28 | -0.28 | -0.31 | -0.25 | 0.09  | -0.24 | -0.34 | -0.29 |
| ILE89  | -0.11 | -0.14 | -0.12 | -0.09 | -0.10 | -0.12 | -0.11 | -0.19 | -0.12 | -0.18 | 0.11  | -0.07 | -0.19 | -0.12 |
| GLU90  | -0.41 | -0.46 | -0.36 | -0.45 | -0.48 | -0.44 | -0.40 | -0.43 | -0.43 | -0.37 | 0.12  | -0.36 | -0.48 | -0.43 |
| ILE91  | 0.06  | 0.09  | -0.02 | 0.04  | 0.07  | 0.03  | -0.02 | -0.01 | 0.00  | -0.03 | 0.14  | 0.11  | -0.03 | 0.04  |
| ASN92  | 0.00  | -0.02 | -0.08 | 0.00  | 0.03  | -0.01 | -0.01 | 0.03  | 0.04  | 0.02  | 0.13  | 0.05  | -0.08 | 0.01  |
| CYS95  | -0.09 | -0.14 | -0.07 | -0.16 | -0.17 | -0.15 | -0.06 | -0.14 | -0.13 | -0.16 | 0.15  | -0.06 | -0.21 | -0.14 |
| ALA96  | -0.16 | -0.19 | -0.17 | -0.16 | -0.13 | -0.17 | -0.18 | -0.14 | -0.16 | -0.15 | 0.07  | -0.13 | -0.20 | -0.17 |
| ILE98  | -0.56 | -0.53 | -0.56 | -0.57 | -0.58 | -0.57 | -0.52 | -0.58 | -0.61 | -0.57 | 0.09  | -0.51 | -0.61 | -0.56 |
| THR99  | 0.13  | 0.14  | 0.14  | 0.12  | 0.12  | 0.15  | 0.07  | 0.15  | 0.16  | 0.15  | 0.10  | 0.18  | 0.07  | 0.13  |
| VAL115 | -0.32 | -0.33 | -0.37 | -0.34 | -0.32 | -0.33 | -0.36 | -0.34 | -0.34 | -0.36 | 0.07  | -0.29 | -0.37 | -0.34 |
| GLY117 | -0.57 | -0.58 | -0.54 | -0.55 | -0.53 | -0.55 | -0.53 | -0.55 | -0.53 | -0.48 | 0.13  | -0.46 | -0.58 | -0.53 |
| ALA118 | 0.22  | 0.20  | 0.16  | 0.18  | 0.17  | 0.18  | 0.23  | 0.22  | 0.20  | 0.15  | 0.11  | 0.24  | 0.13  | 0.19  |
| SER119 | -0.07 | -0.05 | -0.01 | -0.03 | -0.11 | -0.02 | -0.06 | -0.09 | -0.11 | -0.06 | 0.17  | 0.02  | -0.15 | -0.07 |
| GLN120 | 0.00  | -0.08 | -0.02 | -0.03 | 0.00  | -0.04 | -0.01 | -0.04 | -0.03 | -0.02 | 0.12  | 0.01  | -0.11 | -0.05 |
| ASP121 | -0.93 | -0.88 | -0.92 | -0.92 | -0.91 | -0.91 | -0.94 | -0.93 | -0.91 | -0.92 | 0.12  | -0.85 | -0.97 | -0.91 |
| PHE139 | -0.06 | -0.07 | -0.08 | -0.04 | -0.09 | -0.05 | -0.03 | -0.02 | -0.03 | -0.06 | 0.08  | -0.01 | -0.09 | -0.05 |
| LEU140 | -0.14 | -0.16 | -0.16 | -0.23 | -0.18 | -0.19 | -0.18 | -0.21 | -0.20 | -0.14 | 0.10  | -0.14 | -0.24 | -0.19 |
| ASH141 | -0.46 | -0.49 | -0.50 | -0.48 | -0.37 | -0.47 | -0.50 | -0.45 | -0.42 | -0.45 | 0.19  | -0.31 | -0.50 | -0.43 |
| HIE142 | 0.11  | 0.08  | 0.08  | 0.12  | 0.05  | 0.05  | 0.03  | 0.02  | 0.04  | 0.01  | 0.17  | 0.14  | -0.02 | 0.06  |
| TRP143 | 0.28  | 0.30  | 0.30  | 0.35  | 0.29  | 0.26  | 0.27  | 0.29  | 0.30  | 0.29  | 0.12  | 0.35  | 0.23  | 0.29  |

|        |       |       |       |       |       |       |       |       |       |       |      |       |       |       |
|--------|-------|-------|-------|-------|-------|-------|-------|-------|-------|-------|------|-------|-------|-------|
| LYS144 | 0.63  | 0.62  | 0.66  | 0.56  | 0.64  | 0.69  | 0.66  | 0.72  | 0.70  | 0.71  | 0.15 | 0.72  | 0.56  | 0.65  |
| ASP145 | -0.95 | -0.93 | -0.92 | -0.90 | -0.98 | -0.99 | -0.96 | -1.03 | -1.01 | -0.97 | 0.14 | -0.89 | -1.03 | -0.96 |
| ARG146 | 1.16  | 1.12  | 1.09  | 1.09  | 1.18  | 1.13  | 1.13  | 1.13  | 1.12  | 1.09  | 0.13 | 1.21  | 1.09  | 1.12  |
| TYR147 | -0.24 | -0.23 | -0.22 | -0.22 | -0.23 | -0.23 | -0.20 | -0.17 | -0.18 | -0.17 | 0.08 | -0.17 | -0.25 | -0.22 |
| ASP169 | -0.61 | -0.60 | -0.63 | -0.62 | -0.64 | -0.61 | -0.67 | -0.65 | -0.68 | -0.65 | 0.11 | -0.60 | -0.71 | -0.66 |
| ASN170 | -0.10 | -0.10 | -0.15 | -0.08 | -0.07 | -0.12 | -0.08 | -0.06 | -0.03 | -0.12 | 0.13 | -0.02 | -0.15 | -0.08 |
| CYS173 | -0.26 | -0.21 | -0.23 | -0.30 | -0.24 | -0.27 | -0.25 | -0.30 | -0.28 | -0.26 | 0.13 | -0.21 | -0.33 | -0.28 |
| PRO174 | 0.14  | 0.11  | 0.13  | 0.13  | 0.11  | 0.18  | 0.08  | 0.12  | 0.14  | 0.12  | 0.10 | 0.19  | 0.08  | 0.14  |
| LEU198 | -0.15 | -0.16 | -0.17 | -0.13 | -0.14 | -0.11 | -0.11 | -0.12 | -0.13 | -0.16 | 0.09 | -0.09 | -0.18 | -0.13 |
| GLU199 | -0.83 | -0.79 | -0.83 | -0.83 | -0.76 | -0.78 | -0.81 | -0.84 | -0.82 | -0.78 | 0.15 | -0.76 | -0.91 | -0.83 |
| MG216  | 0.07  | 0.08  | 0.08  | 0.08  | 0.07  | 0.09  | 0.08  | 0.08  | 0.08  | 0.08  | 0.03 | 0.09  | 0.06  | 0.07  |
| SAM217 | 0.01  | 0.04  | 0.01  | -0.09 | -0.09 | -0.12 | -0.12 | -0.12 | -0.12 | -0.21 | 0.55 | 0.33  | -0.21 | 0.10  |
| CAT218 | -0.52 | -0.47 | -0.36 | -0.32 | -0.36 | -0.34 | -0.31 | -0.26 | -0.22 | -0.25 | 0.59 | -0.22 | -0.82 | -0.56 |
| WAT226 | -0.14 | -0.13 | -0.11 | -0.07 | -0.10 | -0.11 | -0.06 | -0.06 | -0.11 | -0.11 | 0.10 | -0.04 | -0.14 | -0.09 |
| WAT227 | -0.03 | -0.02 | -0.01 | -0.04 | -0.06 | -0.01 | -0.01 | -0.02 | -0.07 | -0.06 | 0.09 | 0.02  | -0.07 | -0.02 |
| WAT228 | 0.00  | 0.00  | 0.00  | 0.00  | 0.00  | 0.00  | 0.00  | 0.00  | 0.00  | 0.00  | 0.00 | 0.00  | 0.00  | 0.00  |

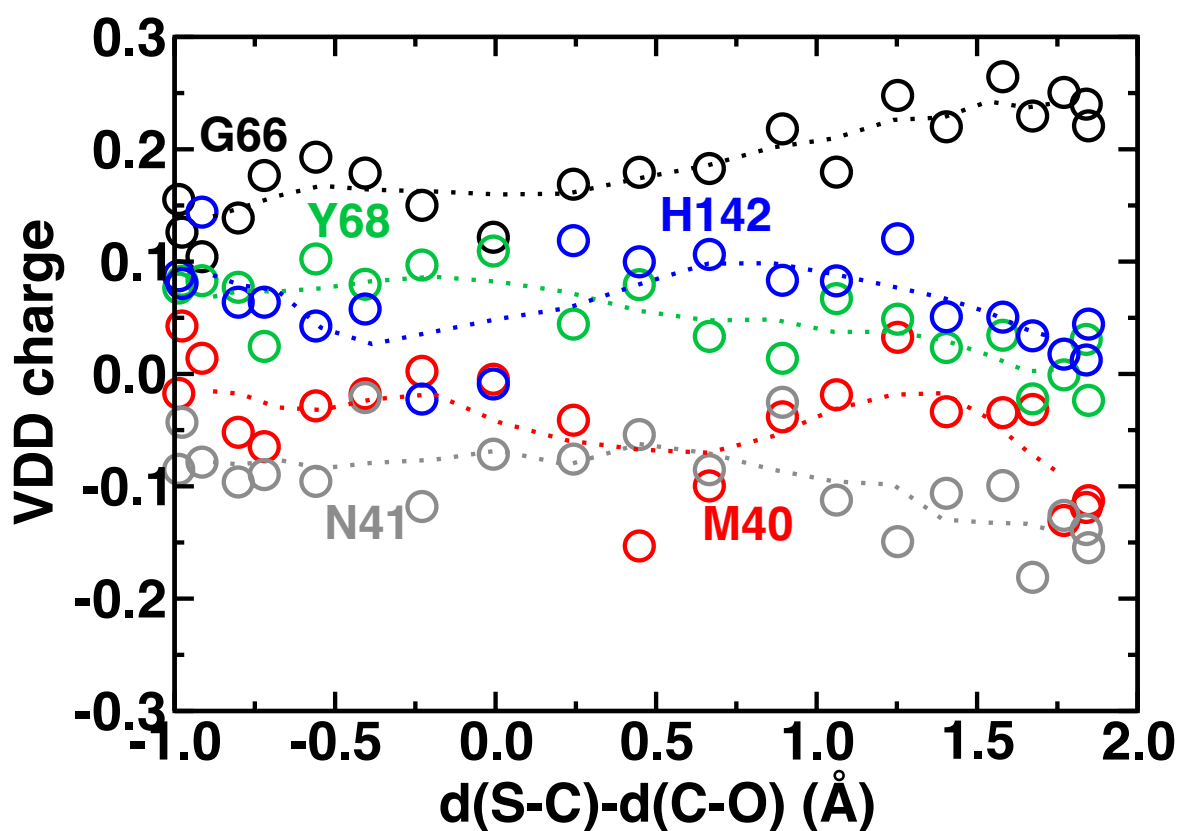

**Figure S4.** Examples of residues with sums of VDD charges that fluctuate strongly over the reaction coordinate.

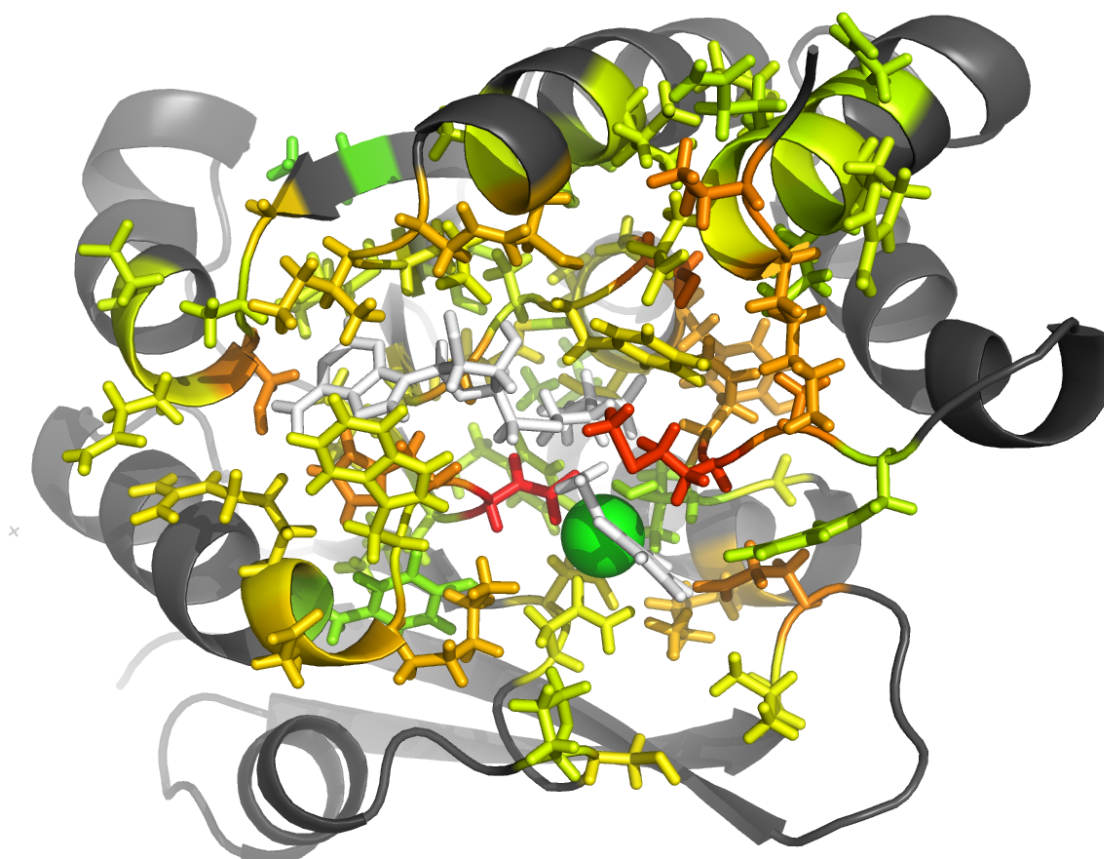

**Figure S5.** Plot of the range of charges sampled for each residue across the reaction coordinate with the highest value (0.22) plotted in red (e.g. M40 and D141) and lowest (0.03 and below) in green (e.g., Y147 and V115).

**Table S8.** Difference of by-residue sums of VDD partial charges for all model 10 residues including link atoms in the sum for the first 11 snapshots of the reaction coordinate obtained by subtracting the partial charge in an apo-COMT simulation from the same result with substrates present.

| Res.  | 1     | 2     | 3    | 4     | 5     | 6     | 7     | 8     | 9    | 10   | 11   |
|-------|-------|-------|------|-------|-------|-------|-------|-------|------|------|------|
| THR4  | -0.06 | -0.08 | 0.06 | 0.01  | 0.04  | 0.04  | 0.03  | 0.07  | 0.08 | 0.04 | 0.09 |
| LYS5  | 0.00  | 0.00  | 0.00 | 0.00  | 0.00  | 0.00  | 0.00  | 0.00  | 0.00 | 0.00 | 0.00 |
| GLU6  | 0.00  | -0.01 | 0.00 | -0.01 | -0.01 | -0.01 | -0.01 | -0.01 | 0.00 | 0.00 | 0.00 |
| GLN7  | 0.00  | 0.00  | 0.00 | 0.00  | 0.00  | 0.00  | 0.00  | 0.00  | 0.00 | 0.00 | 0.00 |
| ARG8  | 0.00  | 0.00  | 0.00 | 0.00  | 0.00  | 0.00  | 0.00  | 0.00  | 0.00 | 0.00 | 0.00 |
| ILE9  | 0.01  | 0.01  | 0.01 | 0.01  | 0.01  | 0.01  | 0.01  | 0.01  | 0.01 | 0.01 | 0.01 |
| LEU10 | 0.00  | 0.00  | 0.00 | 0.00  | 0.00  | 0.00  | 0.00  | 0.00  | 0.00 | 0.00 | 0.00 |
| ASN11 | 0.00  | 0.00  | 0.00 | 0.00  | 0.00  | 0.00  | 0.00  | 0.00  | 0.00 | 0.00 | 0.00 |
| TRP38 | 0.00  | 0.00  | 0.00 | 0.00  | 0.00  | 0.00  | 0.00  | -0.01 | 0.00 | 0.00 | 0.00 |

|        |       |       |       |       |       |       |       |       |       |       |       |
|--------|-------|-------|-------|-------|-------|-------|-------|-------|-------|-------|-------|
| ALA39  | 0.01  | 0.01  | 0.01  | 0.01  | 0.01  | 0.01  | 0.01  | 0.01  | 0.01  | 0.01  | 0.01  |
| MET40  | 0.02  | 0.01  | 0.01  | 0.02  | 0.01  | 0.02  | 0.04  | 0.05  | 0.05  | 0.04  | 0.00  |
| ASN41  | -0.02 | -0.02 | -0.01 | -0.02 | -0.02 | -0.02 | -0.02 | -0.01 | -0.01 | -0.01 | -0.02 |
| VAL42  | -0.08 | -0.08 | -0.09 | -0.10 | -0.09 | -0.08 | -0.08 | -0.07 | -0.09 | -0.09 | -0.07 |
| GLY43  | 0.01  | 0.01  | 0.01  | 0.02  | 0.02  | 0.02  | 0.01  | 0.01  | 0.01  | 0.01  | 0.02  |
| LYS46  | 0.05  | 0.05  | 0.04  | 0.04  | 0.04  | 0.03  | 0.05  | 0.05  | 0.05  | 0.04  | 0.05  |
| GLU64  | 0.15  | 0.17  | 0.16  | 0.17  | 0.15  | 0.11  | 0.11  | 0.11  | 0.11  | 0.14  | 0.15  |
| LEU65  | 0.00  | 0.00  | 0.01  | 0.00  | 0.00  | 0.00  | 0.00  | 0.00  | 0.00  | 0.00  | 0.00  |
| GLY66  | 0.00  | -0.01 | 0.00  | 0.00  | 0.02  | 0.02  | 0.02  | 0.00  | 0.00  | 0.01  | 0.01  |
| ALA67  | 0.07  | 0.07  | 0.06  | 0.10  | 0.10  | 0.12  | 0.09  | 0.12  | 0.09  | 0.10  | 0.11  |
| TYR68  | 0.00  | 0.01  | 0.00  | 0.01  | -0.01 | 0.01  | 0.00  | 0.00  | 0.01  | 0.00  | -0.02 |
| CYS69  | 0.02  | 0.03  | 0.03  | 0.03  | 0.03  | 0.03  | 0.03  | 0.03  | 0.02  | 0.02  | 0.02  |
| GLY70  | -0.03 | -0.03 | -0.03 | -0.02 | -0.02 | -0.02 | -0.02 | -0.02 | -0.02 | -0.02 | -0.02 |
| TYR71  | -0.03 | -0.03 | -0.03 | -0.02 | 0.00  | -0.01 | -0.02 | -0.03 | -0.01 | -0.01 | -0.02 |
| SER72  | 0.07  | 0.08  | 0.05  | 0.03  | 0.06  | 0.04  | 0.07  | 0.04  | 0.04  | 0.03  | 0.05  |
| ALA73  | -0.10 | -0.11 | -0.08 | -0.08 | -0.08 | -0.06 | -0.09 | -0.06 | -0.09 | -0.11 | -0.08 |
| MET76  | 0.01  | 0.01  | 0.01  | 0.01  | 0.01  | 0.01  | 0.01  | 0.01  | 0.01  | 0.01  | 0.01  |
| THR88  | 0.01  | 0.02  | 0.01  | 0.02  | 0.02  | 0.01  | 0.01  | 0.01  | 0.01  | 0.01  | 0.01  |
| ILE89  | 0.00  | 0.00  | -0.01 | 0.00  | -0.01 | 0.00  | 0.00  | -0.01 | 0.00  | 0.00  | 0.00  |
| GLU90  | 0.24  | 0.27  | 0.25  | 0.24  | 0.23  | 0.24  | 0.25  | 0.20  | 0.26  | 0.22  | 0.22  |
| ILE91  | 0.01  | 0.03  | 0.04  | 0.03  | 0.03  | 0.03  | 0.02  | 0.03  | 0.02  | 0.01  | 0.02  |
| ASN92  | 0.02  | 0.02  | 0.02  | 0.01  | 0.02  | 0.02  | 0.02  | 0.01  | 0.02  | 0.01  | 0.02  |
| CYS95  | 0.00  | 0.00  | 0.00  | 0.01  | 0.01  | 0.00  | 0.00  | 0.00  | 0.00  | 0.00  | 0.01  |
| ALA96  | 0.00  | 0.00  | 0.00  | -0.01 | 0.00  | 0.00  | 0.00  | 0.00  | 0.00  | 0.00  | 0.00  |
| ILE98  | 0.01  | 0.01  | 0.01  | 0.01  | 0.01  | 0.01  | 0.01  | 0.01  | 0.01  | 0.01  | 0.01  |
| THR99  | 0.00  | 0.00  | 0.00  | 0.00  | 0.00  | 0.00  | 0.00  | 0.00  | 0.00  | 0.00  | 0.00  |
| VAL115 | 0.00  | 0.00  | 0.00  | 0.00  | 0.00  | 0.00  | 0.00  | 0.00  | 0.00  | 0.00  | 0.00  |
| GLY117 | 0.00  | 0.00  | 0.00  | 0.00  | 0.00  | 0.00  | 0.00  | 0.00  | 0.00  | 0.00  | 0.00  |
| ALA118 | -0.01 | 0.00  | 0.00  | 0.00  | 0.00  | 0.00  | 0.00  | 0.00  | 0.00  | 0.00  | 0.00  |
| SER119 | 0.00  | 0.01  | 0.06  | 0.00  | -0.01 | 0.02  | 0.01  | 0.06  | 0.06  | 0.04  | 0.00  |
| GLN120 | -0.01 | -0.01 | 0.00  | 0.00  | -0.01 | -0.01 | -0.01 | 0.00  | 0.00  | -0.01 | -0.01 |
| ASP121 | 0.01  | 0.01  | 0.01  | 0.01  | 0.00  | 0.01  | 0.01  | 0.01  | 0.00  | 0.01  | 0.00  |
| PHE139 | 0.02  | 0.02  | 0.01  | 0.01  | 0.02  | 0.02  | 0.02  | 0.01  | 0.01  | 0.01  | 0.01  |
| LEU140 | 0.01  | 0.01  | 0.01  | 0.01  | 0.01  | 0.01  | 0.01  | 0.01  | 0.01  | 0.00  | 0.01  |
| ASP141 | -0.15 | -0.17 | -0.18 | -0.12 | -0.07 | -0.19 | -0.18 | -0.20 | -0.16 | -0.17 | -0.21 |
| HIE142 | 0.06  | 0.05  | 0.06  | 0.06  | 0.06  | 0.06  | 0.06  | 0.04  | 0.03  | 0.04  | 0.04  |
| TRP143 | 0.01  | 0.00  | 0.01  | 0.01  | 0.01  | 0.00  | 0.01  | -0.01 | 0.00  | -0.01 | -0.01 |
| LYS144 | 0.00  | 0.00  | 0.00  | 0.00  | 0.00  | 0.00  | 0.00  | 0.00  | 0.00  | 0.00  | 0.00  |
| ASP145 | 0.01  | 0.01  | 0.01  | 0.02  | 0.02  | 0.02  | 0.01  | 0.01  | 0.01  | 0.01  | 0.01  |
| ARG146 | 0.00  | 0.00  | 0.00  | 0.00  | 0.00  | 0.00  | 0.00  | 0.00  | 0.00  | 0.00  | 0.00  |
| TYR147 | 0.01  | 0.01  | 0.01  | 0.01  | 0.01  | 0.01  | 0.01  | 0.01  | 0.01  | 0.01  | 0.01  |
| ASP169 | 0.09  | 0.09  | 0.09  | 0.10  | 0.09  | 0.09  | 0.09  | 0.09  | 0.10  | 0.10  | 0.10  |
| ASN170 | 0.14  | 0.14  | 0.16  | 0.14  | 0.12  | 0.14  | 0.15  | 0.12  | 0.14  | 0.13  | 0.14  |
| CYS173 | 0.00  | 0.00  | 0.00  | 0.00  | 0.00  | 0.00  | 0.00  | 0.00  | 0.00  | 0.00  | 0.00  |

|        |      |      |      |      |      |      |      |      |      |      |      |      |
|--------|------|------|------|------|------|------|------|------|------|------|------|------|
| PRO174 | 0.02 | 0.02 | 0.02 | 0.02 | 0.02 | 0.02 | 0.02 | 0.02 | 0.02 | 0.02 | 0.02 | 0.02 |
| LEU198 | 0.01 | 0.01 | 0.01 | 0.01 | 0.01 | 0.01 | 0.01 | 0.01 | 0.01 | 0.01 | 0.01 | 0.01 |
| GLU199 | 0.11 | 0.10 | 0.11 | 0.11 | 0.12 | 0.11 | 0.11 | 0.12 | 0.13 | 0.13 | 0.12 |      |

**Table S9.** Difference of by-residue sums of VDD partial charges for all model 10 residues including link atoms in the sum for the last 10 snapshots of the reaction coordinate obtained by subtracting the partial charge in an apo-COMT simulation from the same result with substrates present. The range, maximum, minimum, and average of the differences across the entire reaction coordinate is also presented.

| Res.  | 12    | 13    | 14    | 15    | 16    | 17    | 18    | 19    | 20    | 21    | range | max   | min   | avg   |
|-------|-------|-------|-------|-------|-------|-------|-------|-------|-------|-------|-------|-------|-------|-------|
| THR4  | 0.08  | 0.00  | 0.02  | 0.06  | 0.00  | 0.06  | 0.03  | -0.01 | 0.03  | 0.01  | 0.17  | 0.09  | -0.08 | 0.03  |
| LYS5  | 0.00  | 0.00  | 0.00  | 0.00  | 0.00  | 0.00  | 0.00  | 0.00  | 0.00  | 0.00  | 0.00  | 0.00  | 0.00  | 0.00  |
| GLU6  | 0.00  | 0.00  | 0.00  | 0.00  | 0.00  | 0.00  | 0.00  | 0.00  | 0.00  | 0.00  | 0.00  | 0.00  | -0.01 | 0.00  |
| GLN7  | 0.00  | 0.00  | 0.00  | 0.00  | 0.00  | 0.00  | 0.00  | 0.00  | 0.00  | 0.00  | 0.00  | 0.00  | 0.00  | 0.00  |
| ARG8  | 0.00  | 0.00  | 0.00  | 0.00  | 0.00  | 0.00  | 0.00  | 0.00  | 0.00  | 0.00  | 0.00  | 0.00  | 0.00  | 0.00  |
| ILE9  | 0.01  | 0.01  | 0.01  | 0.01  | 0.01  | 0.01  | 0.01  | 0.01  | 0.01  | 0.01  | 0.00  | 0.01  | 0.01  | 0.01  |
| LEU10 | 0.00  | 0.00  | 0.00  | 0.00  | 0.00  | 0.00  | 0.00  | 0.00  | 0.00  | 0.00  | 0.00  | 0.00  | 0.00  | 0.00  |
| ASN11 | 0.00  | 0.00  | 0.00  | 0.00  | 0.00  | 0.00  | 0.00  | 0.00  | 0.00  | 0.00  | 0.00  | 0.00  | 0.00  | 0.00  |
| TRP38 | 0.00  | 0.00  | 0.00  | 0.00  | 0.00  | 0.00  | 0.00  | 0.00  | 0.00  | 0.00  | 0.01  | 0.00  | -0.01 | 0.00  |
| ALA39 | 0.01  | 0.01  | 0.02  | 0.02  | 0.01  | 0.01  | 0.01  | 0.01  | 0.01  | 0.01  | 0.01  | 0.02  | 0.01  | 0.01  |
| MET40 | 0.02  | 0.00  | -0.01 | -0.01 | -0.01 | -0.02 | -0.02 | -0.03 | -0.03 | -0.01 | 0.08  | 0.05  | -0.03 | 0.01  |
| ASN41 | -0.02 | -0.01 | -0.01 | -0.01 | -0.04 | -0.06 | -0.07 | -0.05 | -0.09 | -0.09 | 0.08  | -0.01 | -0.09 | -0.03 |
| VAL42 | -0.09 | -0.08 | -0.09 | -0.11 | -0.10 | -0.10 | -0.11 | -0.11 | -0.09 | -0.09 | 0.04  | -0.07 | -0.11 | -0.09 |
| GLY43 | 0.02  | 0.02  | 0.02  | 0.02  | 0.02  | 0.02  | 0.02  | 0.02  | 0.02  | 0.02  | 0.01  | 0.02  | 0.01  | 0.02  |
| LYS46 | 0.05  | 0.05  | 0.04  | 0.04  | 0.05  | 0.05  | 0.05  | 0.04  | 0.04  | 0.04  | 0.02  | 0.05  | 0.03  | 0.04  |
| GLU64 | 0.17  | 0.17  | 0.13  | 0.14  | 0.11  | 0.14  | 0.14  | 0.08  | 0.12  | 0.10  | 0.09  | 0.17  | 0.08  | 0.14  |
| LEU65 | 0.00  | 0.00  | 0.00  | 0.00  | 0.00  | 0.00  | 0.00  | 0.00  | 0.00  | 0.00  | 0.01  | 0.01  | 0.00  | 0.00  |
| GLY66 | 0.01  | 0.01  | 0.04  | 0.00  | 0.00  | 0.02  | 0.03  | 0.02  | 0.02  | 0.04  | 0.05  | 0.04  | -0.01 | 0.01  |
| ALA67 | 0.12  | 0.09  | 0.12  | 0.10  | 0.10  | 0.10  | 0.09  | 0.11  | 0.10  | 0.13  | 0.07  | 0.13  | 0.06  | 0.10  |
| TYR68 | -0.03 | -0.03 | -0.02 | -0.03 | -0.03 | -0.01 | -0.02 | -0.04 | -0.04 | -0.03 | 0.06  | 0.01  | -0.04 | -0.01 |
| CYS69 | 0.02  | 0.02  | 0.03  | 0.02  | 0.02  | 0.02  | 0.02  | 0.02  | 0.02  | 0.03  | 0.01  | 0.03  | 0.02  | 0.02  |
| GLY70 | -0.02 | -0.02 | -0.02 | -0.02 | -0.02 | -0.02 | -0.02 | -0.02 | -0.02 | -0.02 | 0.01  | -0.02 | -0.03 | -0.02 |
| TYR71 | -0.03 | -0.02 | -0.03 | -0.02 | -0.01 | 0.00  | 0.01  | 0.01  | 0.01  | 0.01  | 0.04  | 0.01  | -0.03 | -0.01 |
| SER72 | 0.05  | 0.06  | 0.05  | 0.09  | 0.07  | 0.06  | 0.06  | 0.07  | 0.06  | 0.10  | 0.08  | 0.10  | 0.03  | 0.06  |
| ALA73 | -0.10 | -0.08 | -0.08 | -0.09 | -0.03 | -0.07 | -0.09 | -0.06 | -0.06 | -0.07 | 0.08  | -0.03 | -0.11 | -0.08 |
| MET76 | 0.01  | 0.01  | 0.01  | 0.01  | 0.01  | 0.01  | 0.01  | 0.01  | 0.01  | 0.01  | 0.00  | 0.01  | 0.01  | 0.01  |
| THR88 | 0.02  | 0.02  | 0.02  | 0.02  | 0.01  | 0.01  | 0.01  | 0.01  | 0.02  | 0.02  | 0.01  | 0.02  | 0.01  | 0.01  |
| ILE89 | -0.01 | 0.00  | -0.01 | 0.01  | 0.00  | 0.00  | 0.00  | 0.00  | 0.00  | -0.01 | 0.01  | 0.01  | -0.01 | 0.00  |
| GLU90 | 0.29  | 0.23  | 0.22  | 0.22  | 0.25  | 0.25  | 0.25  | 0.23  | 0.24  | 0.24  | 0.09  | 0.29  | 0.20  | 0.24  |
| ILE91 | 0.01  | 0.01  | -0.02 | -0.01 | 0.01  | 0.02  | 0.00  | 0.02  | 0.01  | 0.00  | 0.05  | 0.04  | -0.02 | 0.01  |
| ASN92 | 0.02  | 0.02  | 0.02  | 0.02  | 0.02  | 0.02  | 0.02  | 0.01  | 0.02  | 0.02  | 0.01  | 0.02  | 0.01  | 0.02  |
| CYS95 | 0.00  | 0.00  | 0.00  | 0.00  | 0.00  | 0.00  | 0.00  | 0.01  | 0.00  | 0.00  | 0.01  | 0.01  | 0.00  | 0.00  |
| ALA96 | 0.00  | 0.00  | 0.00  | 0.00  | -0.01 | -0.01 | -0.01 | -0.01 | -0.01 | -0.01 | 0.01  | 0.00  | -0.01 | 0.00  |



|        |       |       |       |       |       |       |       |       |       |       |      |       |       |       |
|--------|-------|-------|-------|-------|-------|-------|-------|-------|-------|-------|------|-------|-------|-------|
| ILE98  | 0.01  | 0.01  | 0.01  | 0.01  | 0.01  | 0.01  | 0.01  | 0.01  | 0.01  | 0.01  | 0.00 | 0.01  | 0.01  | 0.01  |
| THR99  | 0.00  | 0.00  | 0.00  | 0.00  | 0.00  | 0.00  | 0.00  | 0.00  | 0.00  | 0.00  | 0.00 | 0.00  | 0.00  | 0.00  |
| VAL115 | 0.00  | 0.00  | 0.00  | 0.00  | 0.00  | 0.00  | 0.00  | 0.00  | 0.00  | 0.00  | 0.00 | 0.00  | 0.00  | 0.00  |
| GLY117 | 0.00  | 0.00  | 0.00  | 0.00  | 0.00  | 0.00  | 0.00  | 0.00  | 0.00  | 0.00  | 0.00 | 0.00  | 0.00  | 0.00  |
| ALA118 | 0.00  | 0.00  | 0.00  | -0.01 | 0.00  | 0.00  | 0.00  | 0.00  | 0.00  | 0.00  | 0.01 | 0.00  | -0.01 | 0.00  |
| SER119 | 0.03  | 0.03  | 0.07  | 0.04  | 0.02  | 0.05  | 0.06  | 0.03  | 0.01  | 0.05  | 0.08 | 0.07  | -0.01 | 0.03  |
| GLN120 | 0.00  | -0.01 | 0.00  | 0.00  | -0.01 | -0.01 | 0.00  | -0.01 | 0.00  | 0.00  | 0.01 | 0.00  | -0.01 | -0.01 |
| ASP121 | 0.00  | 0.00  | 0.00  | 0.00  | 0.00  | 0.00  | 0.00  | 0.00  | 0.00  | 0.00  | 0.00 | 0.01  | 0.00  | 0.00  |
| PHE139 | 0.02  | 0.02  | 0.01  | 0.01  | 0.01  | 0.01  | 0.01  | 0.01  | 0.01  | 0.01  | 0.01 | 0.02  | 0.01  | 0.01  |
| LEU140 | 0.01  | 0.00  | 0.01  | 0.00  | 0.00  | 0.00  | 0.00  | 0.00  | 0.00  | 0.00  | 0.01 | 0.01  | 0.00  | 0.01  |
| ASP141 | -0.14 | -0.24 | -0.24 | -0.17 | -0.15 | -0.21 | -0.20 | -0.19 | -0.14 | -0.15 | 0.18 | -0.07 | -0.24 | -0.17 |
| HIE142 | 0.05  | 0.04  | 0.03  | 0.03  | 0.05  | 0.05  | 0.04  | 0.04  | 0.05  | 0.05  | 0.03 | 0.06  | 0.03  | 0.05  |
| TRP143 | 0.01  | 0.01  | 0.00  | 0.01  | -0.02 | -0.01 | -0.02 | 0.01  | 0.01  | 0.01  | 0.03 | 0.01  | -0.02 | 0.00  |
| LYS144 | 0.00  | -0.01 | -0.01 | -0.01 | -0.01 | -0.01 | -0.01 | -0.01 | -0.01 | -0.01 | 0.01 | 0.00  | -0.01 | 0.00  |
| ASP145 | 0.01  | 0.01  | 0.01  | 0.01  | 0.01  | 0.01  | 0.01  | 0.01  | 0.01  | 0.01  | 0.00 | 0.02  | 0.01  | 0.01  |
| ARG146 | 0.00  | 0.00  | 0.00  | 0.00  | 0.00  | 0.00  | 0.00  | 0.00  | 0.00  | 0.00  | 0.01 | 0.00  | 0.00  | 0.00  |
| TYR147 | 0.01  | 0.01  | 0.00  | 0.01  | 0.01  | 0.01  | 0.01  | 0.01  | 0.01  | 0.01  | 0.00 | 0.01  | 0.00  | 0.01  |
| ASP169 | 0.10  | 0.09  | 0.09  | 0.09  | 0.10  | 0.11  | 0.10  | 0.11  | 0.10  | 0.10  | 0.02 | 0.11  | 0.09  | 0.10  |
| ASN170 | 0.14  | 0.13  | 0.14  | 0.14  | 0.15  | 0.15  | 0.13  | 0.15  | 0.13  | 0.14  | 0.04 | 0.16  | 0.12  | 0.14  |
| CYS173 | 0.00  | 0.00  | 0.00  | 0.00  | 0.00  | 0.01  | 0.00  | 0.00  | 0.00  | 0.00  | 0.01 | 0.01  | 0.00  | 0.00  |
| PRO174 | 0.03  | 0.03  | 0.03  | 0.03  | 0.02  | 0.03  | 0.03  | 0.03  | 0.03  | 0.03  | 0.01 | 0.03  | 0.02  | 0.02  |
| LEU198 | 0.01  | 0.01  | 0.01  | 0.01  | 0.01  | 0.01  | 0.02  | 0.01  | 0.01  | 0.01  | 0.01 | 0.02  | 0.01  | 0.01  |
| GLU199 | 0.14  | 0.17  | 0.10  | 0.13  | 0.16  | 0.14  | 0.14  | 0.10  | 0.11  | 0.11  | 0.07 | 0.17  | 0.10  | 0.12  |

**Table S10.** Difference of by-residue sums of VDD partial charges for all model 10 residues excluding link atoms in the sum for the first 11 snapshots of the reaction coordinate obtained by subtracting the partial charge in an apo-COMT simulation from the same result with substrates present.

| Res.  | 1     | 2     | 3     | 4     | 5     | 6     | 7     | 8     | 9     | 10    | 11    |
|-------|-------|-------|-------|-------|-------|-------|-------|-------|-------|-------|-------|
| THR4  | 0.00  | 0.00  | 0.00  | 0.00  | 0.00  | 0.00  | 0.00  | 0.00  | 0.00  | 0.00  | 0.00  |
| LYS5  | 0.00  | 0.00  | 0.00  | 0.00  | 0.00  | 0.00  | 0.00  | 0.00  | 0.00  | 0.00  | 0.00  |
| GLU6  | 0.00  | -0.01 | 0.00  | -0.01 | -0.01 | -0.01 | -0.01 | -0.01 | 0.00  | 0.00  | 0.00  |
| GLN7  | 0.00  | 0.00  | 0.00  | 0.00  | 0.00  | 0.00  | 0.00  | 0.00  | 0.00  | 0.00  | 0.00  |
| ARG8  | 0.00  | 0.00  | 0.00  | 0.00  | 0.00  | 0.00  | 0.00  | 0.00  | 0.00  | 0.00  | 0.00  |
| ILE9  | 0.01  | 0.01  | 0.01  | 0.01  | 0.01  | 0.01  | 0.01  | 0.01  | 0.01  | 0.01  | 0.01  |
| LEU10 | 0.00  | 0.00  | 0.00  | 0.00  | 0.00  | 0.00  | 0.00  | 0.00  | 0.00  | 0.00  | 0.00  |
| ASN11 | 0.00  | 0.00  | 0.00  | 0.00  | 0.00  | 0.00  | 0.00  | 0.00  | 0.00  | 0.00  | 0.00  |
| TRP38 | -0.01 | 0.00  | 0.00  | -0.01 | 0.00  | -0.01 | 0.00  | -0.01 | 0.00  | -0.01 | 0.00  |
| ALA39 | 0.01  | 0.01  | 0.01  | 0.01  | 0.01  | 0.01  | 0.01  | 0.01  | 0.01  | 0.01  | 0.01  |
| MET40 | 0.02  | 0.01  | 0.01  | 0.02  | 0.01  | 0.02  | 0.04  | 0.05  | 0.05  | 0.04  | 0.00  |
| ASN41 | -0.02 | -0.02 | -0.01 | -0.02 | -0.02 | -0.02 | -0.02 | -0.01 | -0.01 | -0.01 | -0.02 |
| VAL42 | -0.08 | -0.08 | -0.09 | -0.10 | -0.09 | -0.08 | -0.08 | -0.07 | -0.09 | -0.09 | -0.07 |
| GLY43 | 0.01  | 0.01  | 0.01  | 0.02  | 0.02  | 0.02  | 0.01  | 0.01  | 0.01  | 0.01  | 0.01  |
| LYS46 | 0.02  | 0.02  | 0.01  | 0.02  | 0.01  | 0.01  | 0.01  | 0.02  | 0.01  | 0.01  | 0.02  |

|        |       |       |       |       |       |       |       |       |       |       |       |
|--------|-------|-------|-------|-------|-------|-------|-------|-------|-------|-------|-------|
| GLU64  | 0.15  | 0.16  | 0.15  | 0.17  | 0.14  | 0.10  | 0.11  | 0.10  | 0.10  | 0.13  | 0.14  |
| LEU65  | 0.00  | 0.00  | 0.01  | 0.00  | 0.00  | 0.00  | 0.00  | 0.00  | 0.00  | 0.00  | 0.00  |
| GLY66  | 0.00  | -0.01 | 0.00  | 0.00  | 0.02  | 0.02  | 0.02  | 0.00  | 0.00  | 0.01  | 0.01  |
| ALA67  | 0.07  | 0.07  | 0.06  | 0.10  | 0.10  | 0.12  | 0.09  | 0.12  | 0.09  | 0.10  | 0.11  |
| TYR68  | 0.00  | 0.01  | 0.00  | 0.01  | -0.01 | 0.01  | 0.00  | 0.00  | 0.01  | 0.00  | -0.02 |
| CYS69  | 0.02  | 0.03  | 0.03  | 0.03  | 0.03  | 0.03  | 0.03  | 0.03  | 0.02  | 0.02  | 0.02  |
| GLY70  | -0.03 | -0.03 | -0.03 | -0.02 | -0.02 | -0.02 | -0.02 | -0.02 | -0.02 | -0.02 | -0.02 |
| TYR71  | -0.03 | -0.03 | -0.03 | -0.02 | 0.00  | -0.01 | -0.02 | -0.03 | -0.01 | -0.01 | -0.02 |
| SER72  | 0.07  | 0.08  | 0.05  | 0.03  | 0.06  | 0.04  | 0.07  | 0.04  | 0.04  | 0.03  | 0.05  |
| ALA73  | -0.10 | -0.11 | -0.08 | -0.08 | -0.08 | -0.07 | -0.09 | -0.07 | -0.09 | -0.11 | -0.08 |
| MET76  | 0.00  | 0.00  | 0.00  | 0.00  | 0.00  | 0.00  | 0.00  | 0.00  | 0.00  | 0.00  | 0.00  |
| THR88  | 0.01  | 0.02  | 0.01  | 0.02  | 0.02  | 0.01  | 0.01  | 0.01  | 0.01  | 0.01  | 0.01  |
| ILE89  | 0.00  | 0.00  | -0.01 | 0.00  | -0.01 | 0.00  | 0.00  | -0.01 | 0.00  | 0.00  | 0.00  |
| GLU90  | 0.24  | 0.27  | 0.25  | 0.24  | 0.23  | 0.24  | 0.25  | 0.20  | 0.26  | 0.22  | 0.22  |
| ILE91  | 0.01  | 0.03  | 0.04  | 0.03  | 0.03  | 0.03  | 0.02  | 0.03  | 0.02  | 0.01  | 0.02  |
| ASN92  | 0.02  | 0.02  | 0.02  | 0.01  | 0.01  | 0.02  | 0.01  | 0.01  | 0.01  | 0.01  | 0.01  |
| CYS95  | 0.00  | 0.00  | 0.00  | 0.00  | 0.00  | 0.00  | -0.01 | 0.00  | 0.00  | 0.00  | 0.00  |
| ALA96  | -0.01 | -0.01 | -0.01 | -0.01 | -0.01 | 0.00  | -0.01 | -0.01 | -0.01 | 0.00  | -0.01 |
| ILE98  | 0.01  | 0.01  | 0.01  | 0.01  | 0.01  | 0.01  | 0.01  | 0.01  | 0.01  | 0.01  | 0.01  |
| THR99  | 0.00  | 0.00  | 0.00  | 0.00  | 0.00  | 0.00  | 0.00  | 0.00  | 0.00  | 0.00  | 0.00  |
| VAL115 | 0.00  | 0.00  | 0.00  | 0.00  | 0.00  | 0.00  | 0.00  | 0.00  | 0.00  | 0.00  | 0.00  |
| GLY117 | 0.00  | 0.00  | 0.00  | 0.00  | 0.00  | 0.00  | 0.00  | 0.00  | 0.00  | 0.00  | 0.00  |
| ALA118 | -0.01 | 0.00  | 0.00  | 0.00  | 0.00  | 0.00  | 0.00  | 0.00  | 0.00  | 0.00  | 0.00  |
| SER119 | 0.00  | 0.01  | 0.06  | 0.00  | -0.01 | 0.02  | 0.01  | 0.06  | 0.06  | 0.04  | 0.00  |
| GLN120 | -0.01 | -0.01 | 0.00  | 0.00  | -0.01 | -0.01 | -0.01 | 0.00  | 0.00  | -0.01 | -0.01 |
| ASP121 | 0.00  | 0.00  | 0.01  | 0.00  | 0.00  | 0.01  | 0.00  | 0.01  | 0.00  | 0.00  | 0.00  |
| PHE139 | 0.02  | 0.02  | 0.02  | 0.01  | 0.02  | 0.02  | 0.02  | 0.01  | 0.01  | 0.01  | 0.01  |
| LEU140 | 0.01  | 0.01  | 0.01  | 0.01  | 0.01  | 0.01  | 0.01  | 0.01  | 0.01  | 0.00  | 0.01  |
| ASP141 | -0.15 | -0.17 | -0.18 | -0.12 | -0.07 | -0.19 | -0.18 | -0.20 | -0.16 | -0.17 | -0.21 |
| HIE142 | 0.06  | 0.05  | 0.06  | 0.06  | 0.06  | 0.06  | 0.06  | 0.04  | 0.03  | 0.04  | 0.04  |
| TRP143 | 0.01  | 0.00  | 0.01  | 0.01  | 0.01  | 0.00  | 0.01  | -0.01 | 0.00  | -0.01 | -0.01 |
| LYS144 | 0.00  | 0.00  | 0.00  | 0.00  | 0.00  | 0.00  | 0.00  | 0.00  | 0.00  | 0.00  | 0.00  |
| ASP145 | 0.01  | 0.01  | 0.01  | 0.02  | 0.02  | 0.02  | 0.01  | 0.01  | 0.01  | 0.01  | 0.01  |
| ARG146 | 0.00  | 0.00  | 0.00  | 0.00  | 0.00  | 0.00  | 0.00  | 0.00  | 0.00  | 0.00  | 0.00  |
| TYR147 | 0.00  | 0.00  | 0.00  | 0.00  | 0.00  | 0.00  | 0.00  | 0.01  | 0.00  | 0.00  | 0.00  |
| ASP169 | 0.09  | 0.09  | 0.08  | 0.10  | 0.09  | 0.08  | 0.08  | 0.09  | 0.09  | 0.10  | 0.09  |
| ASN170 | 0.13  | 0.13  | 0.15  | 0.13  | 0.11  | 0.13  | 0.14  | 0.11  | 0.12  | 0.12  | 0.12  |
| CYS173 | -0.01 | -0.01 | -0.01 | -0.01 | -0.01 | -0.01 | -0.01 | -0.01 | -0.01 | -0.01 | -0.01 |
| PRO174 | 0.02  | 0.02  | 0.02  | 0.02  | 0.02  | 0.02  | 0.02  | 0.02  | 0.02  | 0.02  | 0.02  |
| LEU198 | 0.01  | 0.01  | 0.01  | 0.01  | 0.02  | 0.01  | 0.01  | 0.02  | 0.01  | 0.01  | 0.01  |
| GLU199 | 0.10  | 0.10  | 0.11  | 0.11  | 0.12  | 0.11  | 0.11  | 0.12  | 0.12  | 0.13  | 0.11  |

**Table S11.** Difference of by-residue sums of VDD partial charges for all model 10 residues excluding link atoms in the sum for the last 10 snapshots of the reaction coordinate obtained by subtracting the partial charge in an apo-COMT simulation from the same result with substrates present. The range, maximum, minimum, and average of the differences across the entire reaction coordinate is also presented.

|        | 12    | 13    | 14    | 15    | 16    | 17    | 18    | 19    | 20    | 21    | range | max   | min   | avg   |
|--------|-------|-------|-------|-------|-------|-------|-------|-------|-------|-------|-------|-------|-------|-------|
| THR4   | 0.00  | 0.00  | 0.00  | 0.00  | 0.00  | 0.00  | 0.00  | 0.00  | 0.00  | 0.00  | 0.00  | 0.00  | 0.00  | 0.00  |
| LYS5   | 0.00  | 0.00  | 0.00  | 0.00  | 0.00  | 0.00  | 0.00  | 0.00  | 0.00  | 0.00  | 0.00  | 0.00  | 0.00  | 0.00  |
| GLU6   | 0.00  | 0.00  | 0.00  | 0.00  | 0.00  | 0.00  | 0.00  | 0.00  | 0.00  | 0.00  | 0.00  | 0.00  | -0.01 | 0.00  |
| GLN7   | 0.00  | 0.00  | 0.00  | 0.00  | 0.00  | 0.00  | 0.00  | 0.00  | 0.00  | 0.00  | 0.00  | 0.00  | 0.00  | 0.00  |
| ARG8   | 0.00  | 0.00  | 0.00  | 0.00  | 0.00  | 0.00  | 0.00  | 0.00  | 0.00  | 0.00  | 0.00  | 0.00  | 0.00  | 0.00  |
| ILE9   | 0.01  | 0.01  | 0.01  | 0.01  | 0.01  | 0.01  | 0.01  | 0.01  | 0.01  | 0.01  | 0.00  | 0.01  | 0.01  | 0.01  |
| LEU10  | 0.00  | 0.00  | 0.00  | 0.00  | 0.00  | 0.00  | 0.00  | 0.00  | 0.00  | 0.00  | 0.00  | 0.00  | 0.00  | 0.00  |
| ASN11  | 0.00  | 0.00  | 0.00  | 0.00  | 0.00  | 0.00  | 0.00  | 0.00  | 0.00  | 0.00  | 0.00  | 0.00  | 0.00  | 0.00  |
| TRP38  | 0.00  | 0.00  | 0.00  | 0.00  | 0.00  | 0.00  | 0.00  | 0.00  | -0.01 | 0.00  | 0.01  | 0.00  | -0.01 | 0.00  |
| ALA39  | 0.01  | 0.01  | 0.02  | 0.02  | 0.01  | 0.01  | 0.01  | 0.01  | 0.01  | 0.01  | 0.01  | 0.02  | 0.01  | 0.01  |
| MET40  | 0.02  | 0.00  | -0.01 | -0.01 | -0.01 | -0.02 | -0.02 | -0.03 | -0.03 | -0.01 | 0.08  | 0.05  | -0.03 | 0.01  |
| ASN41  | -0.02 | -0.01 | -0.01 | -0.01 | -0.04 | -0.06 | -0.07 | -0.05 | -0.09 | -0.09 | 0.08  | -0.01 | -0.09 | -0.03 |
| VAL42  | -0.09 | -0.08 | -0.09 | -0.11 | -0.10 | -0.10 | -0.11 | -0.11 | -0.09 | -0.09 | 0.04  | -0.07 | -0.11 | -0.09 |
| GLY43  | 0.01  | 0.01  | 0.02  | 0.02  | 0.01  | 0.02  | 0.02  | 0.02  | 0.02  | 0.02  | 0.01  | 0.02  | 0.01  | 0.01  |
| LYS46  | 0.01  | 0.02  | 0.02  | 0.02  | 0.02  | 0.01  | 0.02  | 0.01  | 0.02  | 0.01  | 0.01  | 0.02  | 0.01  | 0.02  |
| GLU64  | 0.16  | 0.16  | 0.12  | 0.13  | 0.10  | 0.13  | 0.13  | 0.07  | 0.11  | 0.10  | 0.09  | 0.17  | 0.07  | 0.13  |
| LEU65  | 0.00  | 0.00  | 0.00  | 0.00  | 0.00  | 0.00  | 0.00  | 0.00  | 0.00  | 0.00  | 0.01  | 0.01  | 0.00  | 0.00  |
| GLY66  | 0.01  | 0.01  | 0.04  | 0.00  | 0.00  | 0.02  | 0.03  | 0.02  | 0.02  | 0.04  | 0.05  | 0.04  | -0.01 | 0.01  |
| ALA67  | 0.12  | 0.09  | 0.12  | 0.10  | 0.10  | 0.10  | 0.09  | 0.11  | 0.10  | 0.13  | 0.07  | 0.13  | 0.06  | 0.10  |
| TYR68  | -0.03 | -0.03 | -0.02 | -0.03 | -0.03 | -0.01 | -0.02 | -0.04 | -0.04 | -0.03 | 0.06  | 0.01  | -0.04 | -0.01 |
| CYS69  | 0.02  | 0.02  | 0.03  | 0.02  | 0.02  | 0.02  | 0.02  | 0.02  | 0.02  | 0.03  | 0.01  | 0.03  | 0.02  | 0.02  |
| GLY70  | -0.02 | -0.02 | -0.02 | -0.02 | -0.02 | -0.02 | -0.02 | -0.02 | -0.02 | -0.02 | 0.01  | -0.02 | -0.03 | -0.02 |
| TYR71  | -0.03 | -0.02 | -0.03 | -0.02 | -0.01 | 0.00  | 0.01  | 0.01  | 0.01  | 0.01  | 0.04  | 0.01  | -0.03 | -0.01 |
| SER72  | 0.05  | 0.06  | 0.05  | 0.09  | 0.07  | 0.06  | 0.06  | 0.07  | 0.06  | 0.10  | 0.08  | 0.10  | 0.03  | 0.06  |
| ALA73  | -0.10 | -0.09 | -0.08 | -0.10 | -0.04 | -0.08 | -0.09 | -0.07 | -0.06 | -0.08 | 0.08  | -0.04 | -0.11 | -0.08 |
| MET76  | 0.00  | 0.00  | 0.00  | 0.00  | 0.00  | 0.00  | 0.00  | 0.00  | 0.00  | 0.00  | 0.00  | 0.00  | 0.00  | 0.00  |
| THR88  | 0.02  | 0.02  | 0.02  | 0.01  | 0.01  | 0.01  | 0.01  | 0.01  | 0.01  | 0.01  | 0.01  | 0.02  | 0.01  | 0.01  |
| ILE89  | -0.01 | 0.00  | -0.01 | 0.01  | 0.00  | 0.00  | 0.00  | 0.00  | 0.00  | -0.01 | 0.01  | 0.01  | -0.01 | 0.00  |
| GLU90  | 0.29  | 0.23  | 0.22  | 0.22  | 0.25  | 0.25  | 0.25  | 0.23  | 0.24  | 0.24  | 0.09  | 0.29  | 0.20  | 0.24  |
| ILE91  | 0.01  | 0.01  | -0.02 | -0.01 | 0.01  | 0.02  | 0.00  | 0.02  | 0.01  | 0.00  | 0.05  | 0.04  | -0.02 | 0.01  |
| ASN92  | 0.02  | 0.01  | 0.02  | 0.02  | 0.02  | 0.02  | 0.02  | 0.01  | 0.02  | 0.02  | 0.01  | 0.02  | 0.01  | 0.02  |
| CYS95  | 0.00  | 0.00  | 0.00  | 0.00  | 0.00  | 0.00  | 0.00  | 0.00  | 0.00  | 0.00  | 0.01  | 0.00  | -0.01 | 0.00  |
| ALA96  | -0.01 | 0.00  | -0.01 | -0.01 | -0.01 | -0.01 | -0.01 | -0.01 | -0.01 | -0.01 | 0.00  | 0.00  | -0.01 | -0.01 |
| ILE98  | 0.01  | 0.01  | 0.01  | 0.01  | 0.01  | 0.01  | 0.01  | 0.01  | 0.01  | 0.01  | 0.00  | 0.01  | 0.01  | 0.01  |
| THR99  | 0.00  | 0.00  | 0.00  | 0.00  | 0.00  | 0.00  | 0.00  | 0.00  | 0.00  | 0.00  | 0.00  | 0.00  | 0.00  | 0.00  |
| VAL115 | 0.00  | 0.00  | 0.00  | 0.00  | 0.00  | 0.00  | 0.00  | 0.00  | 0.00  | 0.00  | 0.00  | 0.00  | 0.00  | 0.00  |
| GLY117 | 0.00  | 0.00  | 0.00  | 0.00  | 0.00  | 0.00  | 0.00  | 0.00  | 0.00  | 0.00  | 0.00  | 0.00  | 0.00  | 0.00  |
| ALA118 | 0.00  | 0.00  | 0.00  | -0.01 | 0.00  | 0.00  | 0.00  | 0.00  | 0.00  | 0.00  | 0.01  | 0.00  | -0.01 | 0.00  |
| SER119 | 0.03  | 0.03  | 0.07  | 0.04  | 0.02  | 0.05  | 0.06  | 0.03  | 0.01  | 0.05  | 0.08  | 0.07  | -0.01 | 0.03  |

|        |       |       |       |       |       |       |       |       |       |       |      |       |       |       |
|--------|-------|-------|-------|-------|-------|-------|-------|-------|-------|-------|------|-------|-------|-------|
| GLN120 | 0.00  | -0.01 | 0.00  | 0.00  | -0.01 | -0.01 | 0.00  | -0.01 | 0.00  | 0.00  | 0.01 | 0.00  | -0.01 | -0.01 |
| ASP121 | 0.00  | 0.00  | 0.00  | 0.00  | 0.00  | 0.00  | 0.00  | 0.00  | 0.00  | 0.00  | 0.00 | 0.01  | 0.00  | 0.00  |
| PHE139 | 0.02  | 0.02  | 0.01  | 0.02  | 0.01  | 0.01  | 0.01  | 0.01  | 0.01  | 0.01  | 0.01 | 0.02  | 0.01  | 0.02  |
| LEU140 | 0.01  | 0.00  | 0.01  | 0.00  | 0.00  | 0.00  | 0.00  | 0.00  | 0.00  | 0.00  | 0.01 | 0.01  | 0.00  | 0.01  |
| ASP141 | -0.14 | -0.24 | -0.24 | -0.17 | -0.15 | -0.21 | -0.20 | -0.19 | -0.14 | -0.15 | 0.18 | -0.07 | -0.24 | -0.17 |
| HIE142 | 0.05  | 0.04  | 0.03  | 0.03  | 0.05  | 0.05  | 0.04  | 0.04  | 0.05  | 0.05  | 0.03 | 0.06  | 0.03  | 0.05  |
| TRP143 | 0.01  | 0.01  | 0.00  | 0.01  | -0.02 | -0.01 | -0.02 | 0.01  | 0.01  | 0.01  | 0.03 | 0.01  | -0.02 | 0.00  |
| LYS144 | 0.00  | -0.01 | -0.01 | -0.01 | -0.01 | -0.01 | -0.01 | -0.01 | -0.01 | -0.01 | 0.01 | 0.00  | -0.01 | 0.00  |
| ASP145 | 0.01  | 0.01  | 0.01  | 0.01  | 0.01  | 0.01  | 0.01  | 0.01  | 0.01  | 0.01  | 0.00 | 0.02  | 0.01  | 0.01  |
| ARG146 | 0.00  | 0.00  | 0.00  | 0.00  | 0.00  | 0.00  | 0.00  | 0.00  | 0.00  | 0.00  | 0.01 | 0.00  | 0.00  | 0.00  |
| TYR147 | 0.00  | 0.01  | 0.00  | 0.00  | 0.00  | 0.00  | 0.00  | 0.01  | 0.00  | 0.00  | 0.00 | 0.01  | 0.00  | 0.00  |
| ASP169 | 0.10  | 0.09  | 0.08  | 0.09  | 0.10  | 0.10  | 0.09  | 0.10  | 0.09  | 0.09  | 0.02 | 0.10  | 0.08  | 0.09  |
| ASN170 | 0.13  | 0.12  | 0.13  | 0.12  | 0.14  | 0.14  | 0.12  | 0.13  | 0.12  | 0.12  | 0.04 | 0.15  | 0.11  | 0.13  |
| CYS173 | -0.01 | -0.01 | -0.01 | -0.01 | -0.01 | -0.01 | -0.01 | -0.01 | -0.01 | -0.01 | 0.01 | -0.01 | -0.01 | -0.01 |
| PRO174 | 0.02  | 0.02  | 0.02  | 0.02  | 0.02  | 0.02  | 0.02  | 0.02  | 0.02  | 0.03  | 0.01 | 0.03  | 0.02  | 0.02  |
| LEU198 | 0.01  | 0.02  | 0.02  | 0.02  | 0.02  | 0.02  | 0.02  | 0.02  | 0.02  | 0.01  | 0.01 | 0.02  | 0.01  | 0.01  |
| GLU199 | 0.13  | 0.17  | 0.09  | 0.13  | 0.16  | 0.13  | 0.13  | 0.10  | 0.10  | 0.11  | 0.07 | 0.17  | 0.09  | 0.12  |

**Table S12.** Summary of residues included in 11 residue and 16 residue reduced models along side the first model number in which each residue appears (right column).

| 11 residue |     |   | 16 residue |     |   |
|------------|-----|---|------------|-----|---|
| VAL        | 42  | 2 | <i>MET</i> | 40  | 5 |
| GLU        | 64  | 8 | ASN        | 41  | 7 |
| ALA        | 67  | 6 | VAL        | 42  | 2 |
| SER        | 72  | 4 | GLU        | 64  | 8 |
| ALA        | 73  | 9 | ALA        | 67  | 6 |
| GLU        | 90  | 3 | TYR        | 68  | 4 |
| ASP        | 141 | 3 | SER        | 72  | 4 |
| HIS        | 142 | 4 | ALA        | 73  | 9 |
| ASP        | 169 | 8 | GLU        | 90  | 3 |
| ASN        | 170 | 3 | ILE        | 91  | 4 |
| GLU        | 199 | 2 | SER        | 119 | 3 |
| MG         |     | 1 | ASP        | 141 | 3 |
| SAM        |     | 1 | HIS        | 142 | 4 |

|     |  |   |     |     |   |
|-----|--|---|-----|-----|---|
| CAT |  | 1 | ASP | 169 | 8 |
| WAT |  | 2 | ASN | 170 | 3 |
|     |  |   | GLU | 199 | 2 |
|     |  |   | MG  |     | 1 |
|     |  |   | SAM |     | 1 |
|     |  |   | CAT |     | 1 |
|     |  |   | WAT |     | 2 |
|     |  |   |     |     |   |

**Table S13.** Residues present in models 1-4 missing from modified models.

| Res | #   | M |
|-----|-----|---|
| LYS | 144 | 2 |
| GLY | 66  | 4 |
| TYR | 71  | 4 |

**Text S2.** Description of coordinates.zip file.

1. COMT\_QMMMRegions\_v2.pse:

Each Pymol object is named following the region numbering described in the manuscript.

Each one may be shown or hidden in Pymol by clicking to select/deselect the region.

Each region or the entire protein may be exported as a PDB file with "File>Save Molecule..." in Pymol.

The sequence of each region may also be shown.

2. Initial structure from MD:

initcoords.pdb

3. R\*.pdb, TS\*.pdb, P\*.pdb:

The reactant, transition state, and product for each model as indicated in the file name, e.g. 'R-M1.pdb'. All atoms shown, whether from QM or MM region.

**Table S14.** Comparison of CSA on Model 1 and Model 10 reactant geometries

| Res.  | Model 10 Reactant | Model 1 Reactant |
|-------|-------------------|------------------|
| THR4  | 0.00              | 0.00             |
| LYS5  | 0.00              | 0.00             |
| GLU6  | 0.00              | -0.01            |
| GLN7  | 0.00              | 0.01             |
| ARG8  | 0.00              | 0.01             |
| ILE9  | 0.01              | 0.00             |
| LEU10 | 0.00              | 0.01             |
| ASN11 | 0.00              | 0.01             |
| TRP38 | -0.01             | 0.02             |
| ALA39 | 0.01              | 0.01             |
| MET40 | 0.02              | 0.09             |
| ASN41 | -0.02             | -0.04            |
| VAL42 | -0.08             | -0.07            |
| GLY43 | 0.01              | 0.01             |
| LYS46 | 0.02              | 0.04             |
| GLU64 | 0.15              | 0.07             |
| LEU65 | 0.00              | -0.01            |
| GLY66 | 0.00              | -0.03            |
| ALA67 | 0.07              | 0.06             |
| TYR68 | 0.00              | -0.03            |
| CYS69 | 0.02              | 0.03             |
| GLY70 | -0.03             | -0.01            |
| TYR71 | -0.03             | 0.00             |
| SER72 | 0.07              | 0.06             |
| ALA73 | -0.10             | -0.07            |
| MET76 | 0.00              | 0.00             |
| THR88 | 0.01              | 0.01             |
| ILE89 | 0.00              | 0.00             |
| GLU90 | 0.24              | 0.26             |
| ILE91 | 0.01              | 0.01             |

|        |       |       |
|--------|-------|-------|
| ASN92  | 0.02  | 0.01  |
| CYS95  | 0.00  | 0.00  |
| ALA96  | -0.01 | 0.00  |
| ILE98  | 0.01  | 0.01  |
| THR99  | 0.00  | -0.01 |
| VAL115 | 0.00  | 0.00  |
| GLY117 | 0.00  | -0.01 |
| ALA118 | -0.01 | 0.00  |
| SER119 | 0.00  | -0.04 |
| GLN120 | -0.01 | 0.00  |
| ASP121 | 0.00  | 0.01  |
| PHE139 | 0.02  | 0.04  |
| LEU140 | 0.01  | 0.04  |
| ASP141 | -0.15 | -0.18 |
| HIE142 | 0.06  | 0.05  |
| TRP143 | 0.01  | 0.03  |
| LYS144 | 0.00  | 0.00  |
| ASP145 | 0.01  | 0.03  |
| ARG146 | 0.00  | 0.00  |
| TYR147 | 0.00  | 0.02  |
| ASP169 | 0.09  | 0.12  |
| ASN170 | 0.13  | 0.19  |
| CYS173 | -0.01 | -0.01 |
| PRO174 | 0.02  | 0.03  |
| LEU198 | 0.01  | 0.03  |
| GLU199 | 0.10  | 0.14  |
